# Supplementary material for: Organocatalytic Asymmetric Synthesis of Dihydroisoquinolinones via a One-Pot Aza-Henry–Hemiaminalization–Oxidation Sequence
Source: PubMed Central journal article supplement — Synthesis (Stuttg). Author manuscript; Available in PMC 2015 Dec 29. (PMC4693956; doi:10.1055/s-0034-1379398), 2015-02-01

Supporting Information  
for DOI: 10.1055/s-0034-1379398  
© Georg Thieme Verlag KG Stuttgart · New York 2014

# Organocatalytic Asymmetric Synthesis of Dihydroisoquinolinones via a One-Pot Aza-Henry-Hemiaminalization-Oxidation Sequence

Robert Hahn, Ehsan Jafari, Gerhard Raabe, Dieter Enders\*

*Institute of Organic Chemistry, RWTH Aachen University, Landoltweg 1, 52074 Aachen, Germany  
Fax: (+49)-241-809-2127;  
E-mail: enders@rwth-aachen.de*

## Supporting Information

|                                                  |     |
|--------------------------------------------------|-----|
| <sup>1</sup> H and <sup>13</sup> C spectra ..... | S2  |
| HPLC and SFC chromatograms .....                 | S28 |

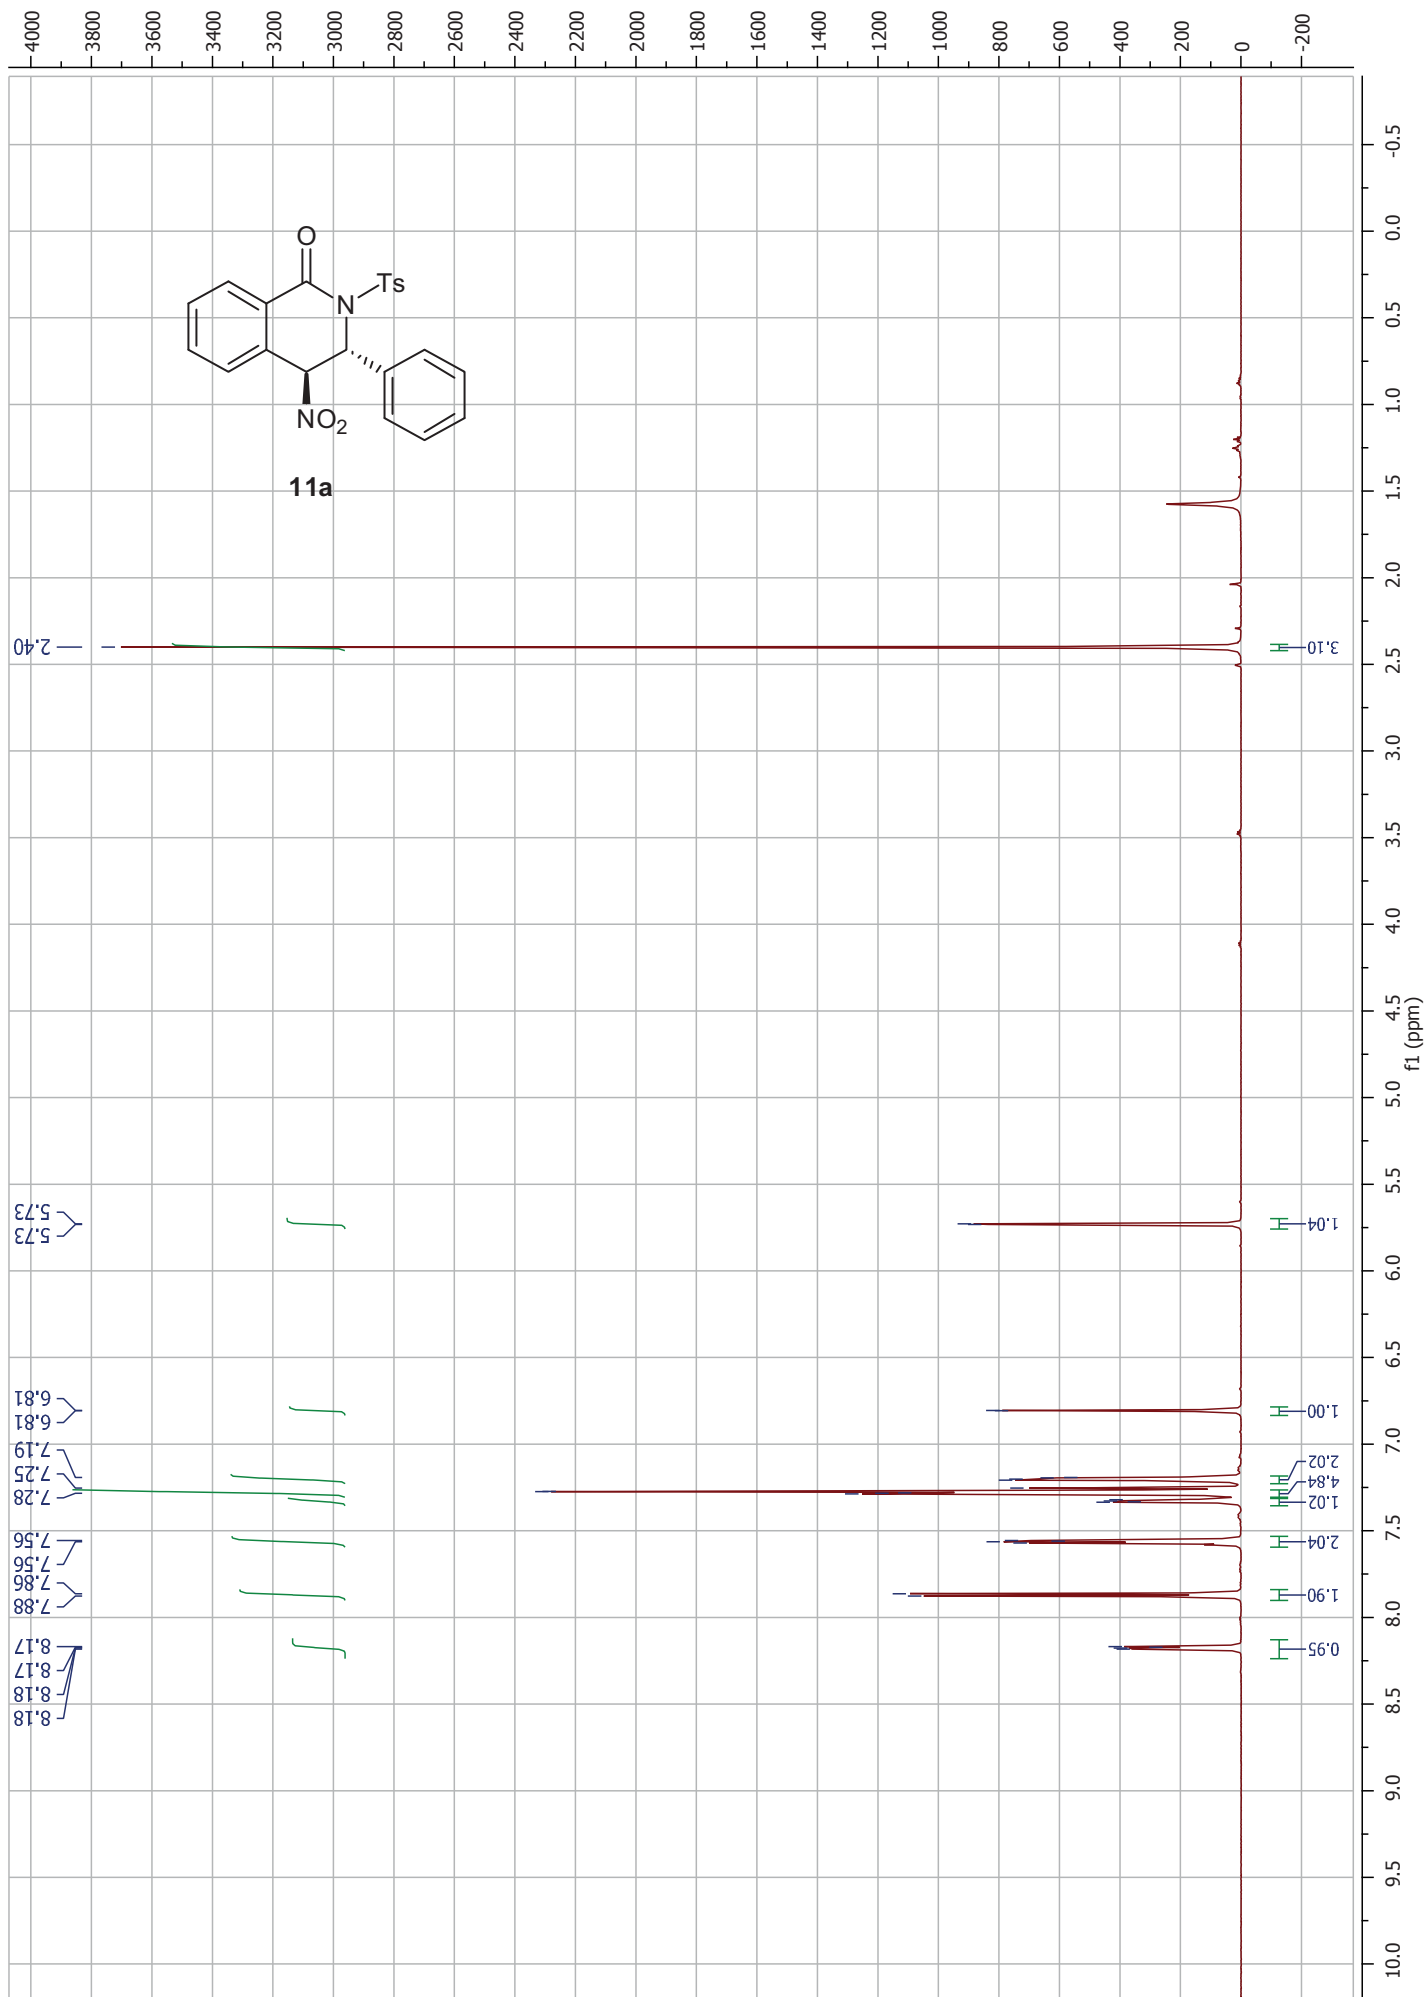

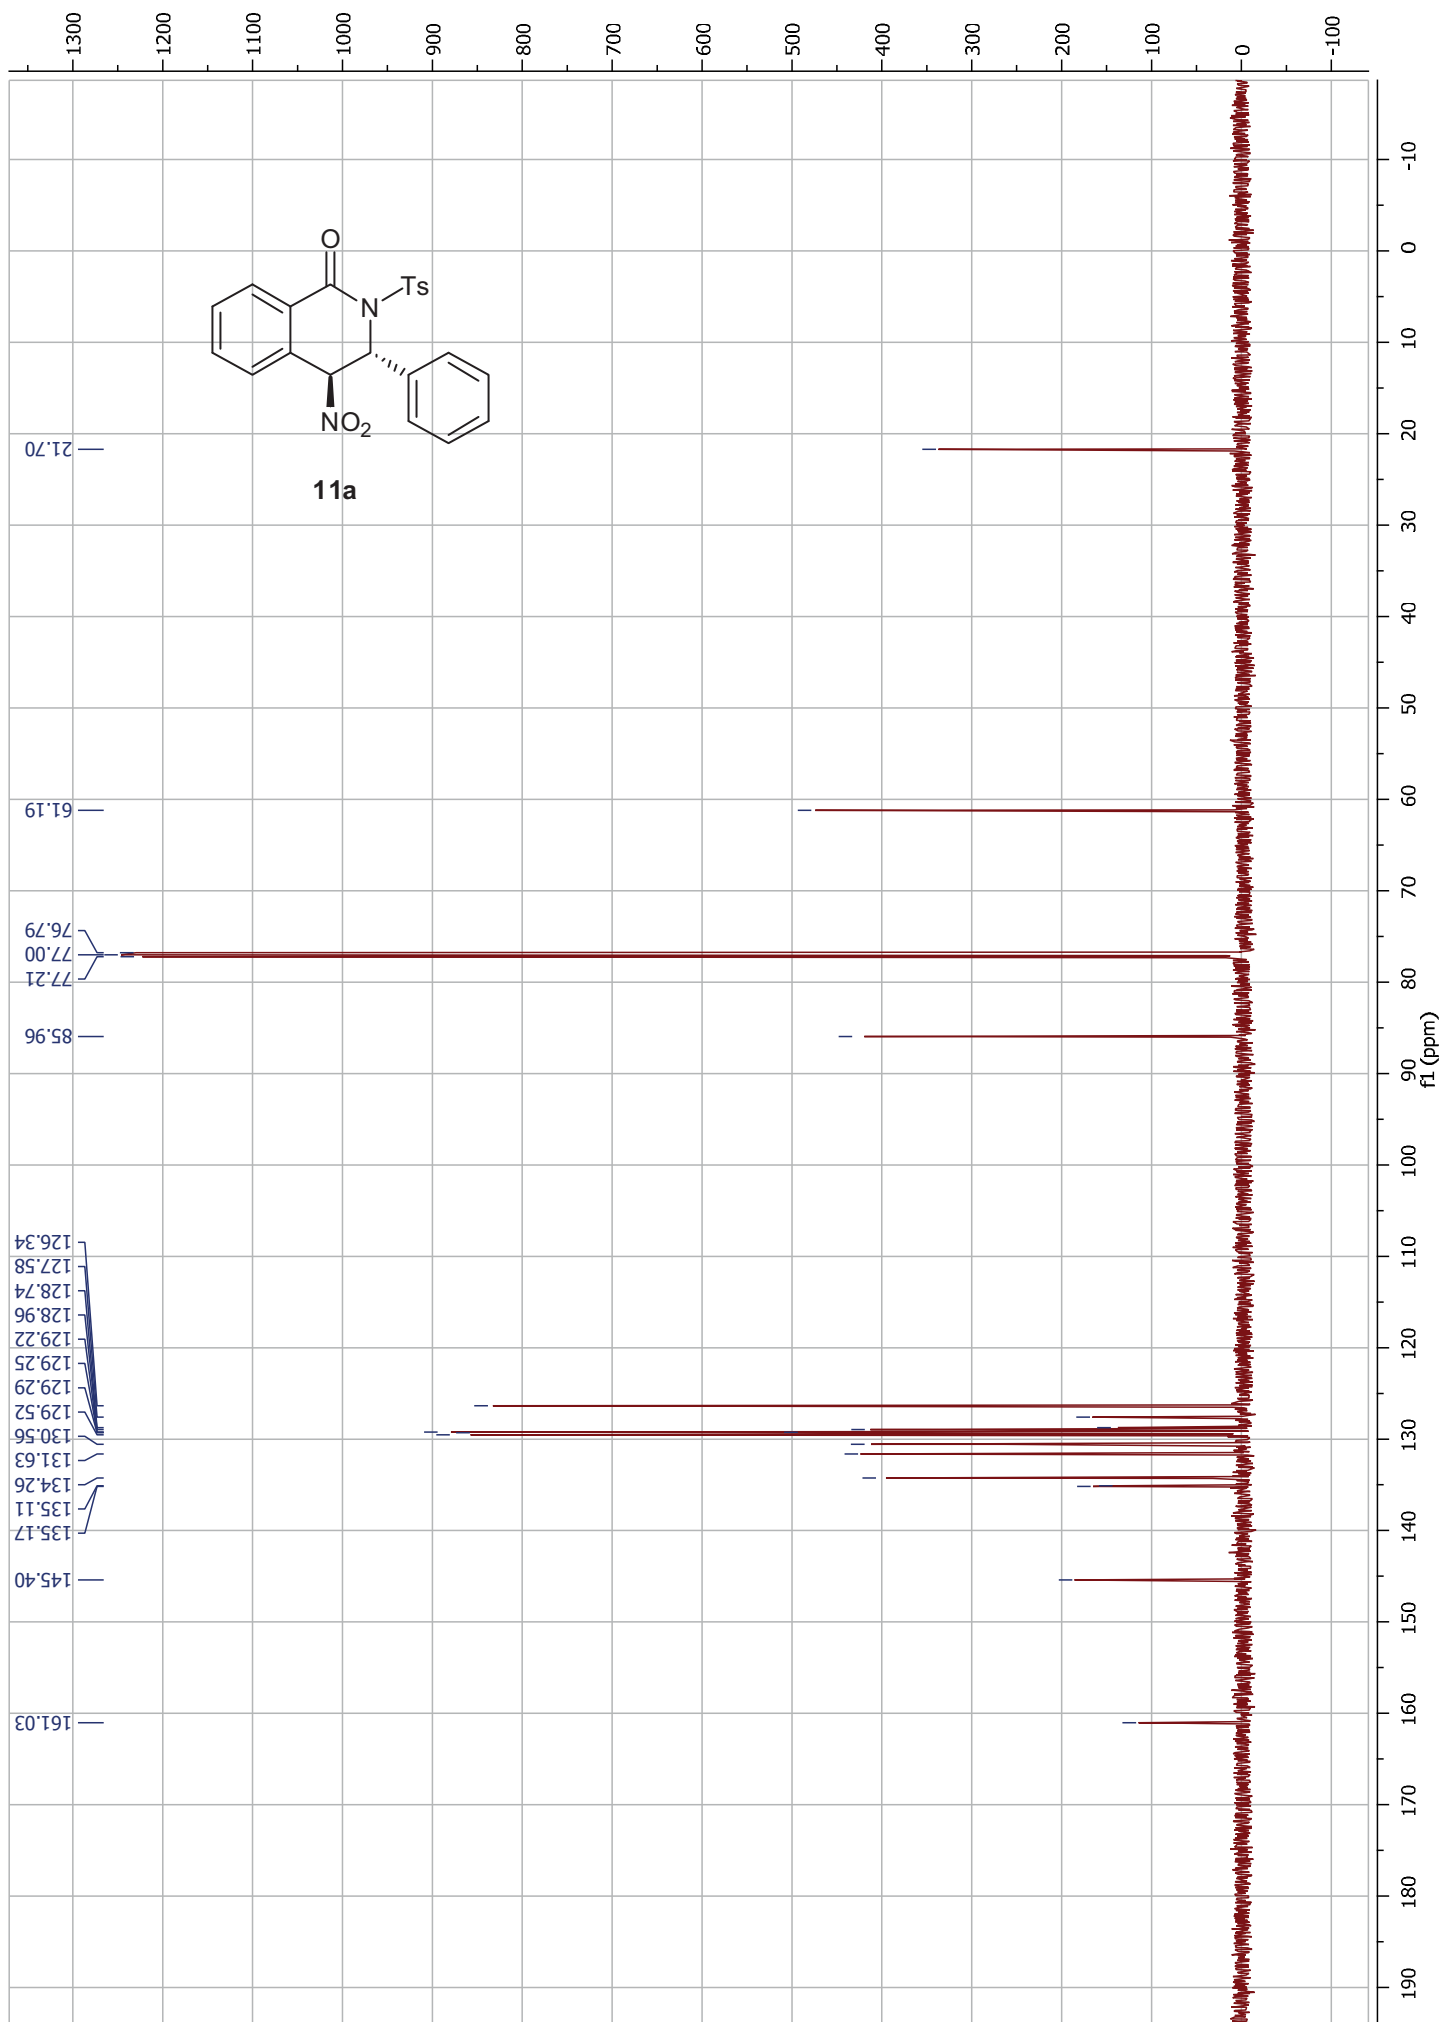

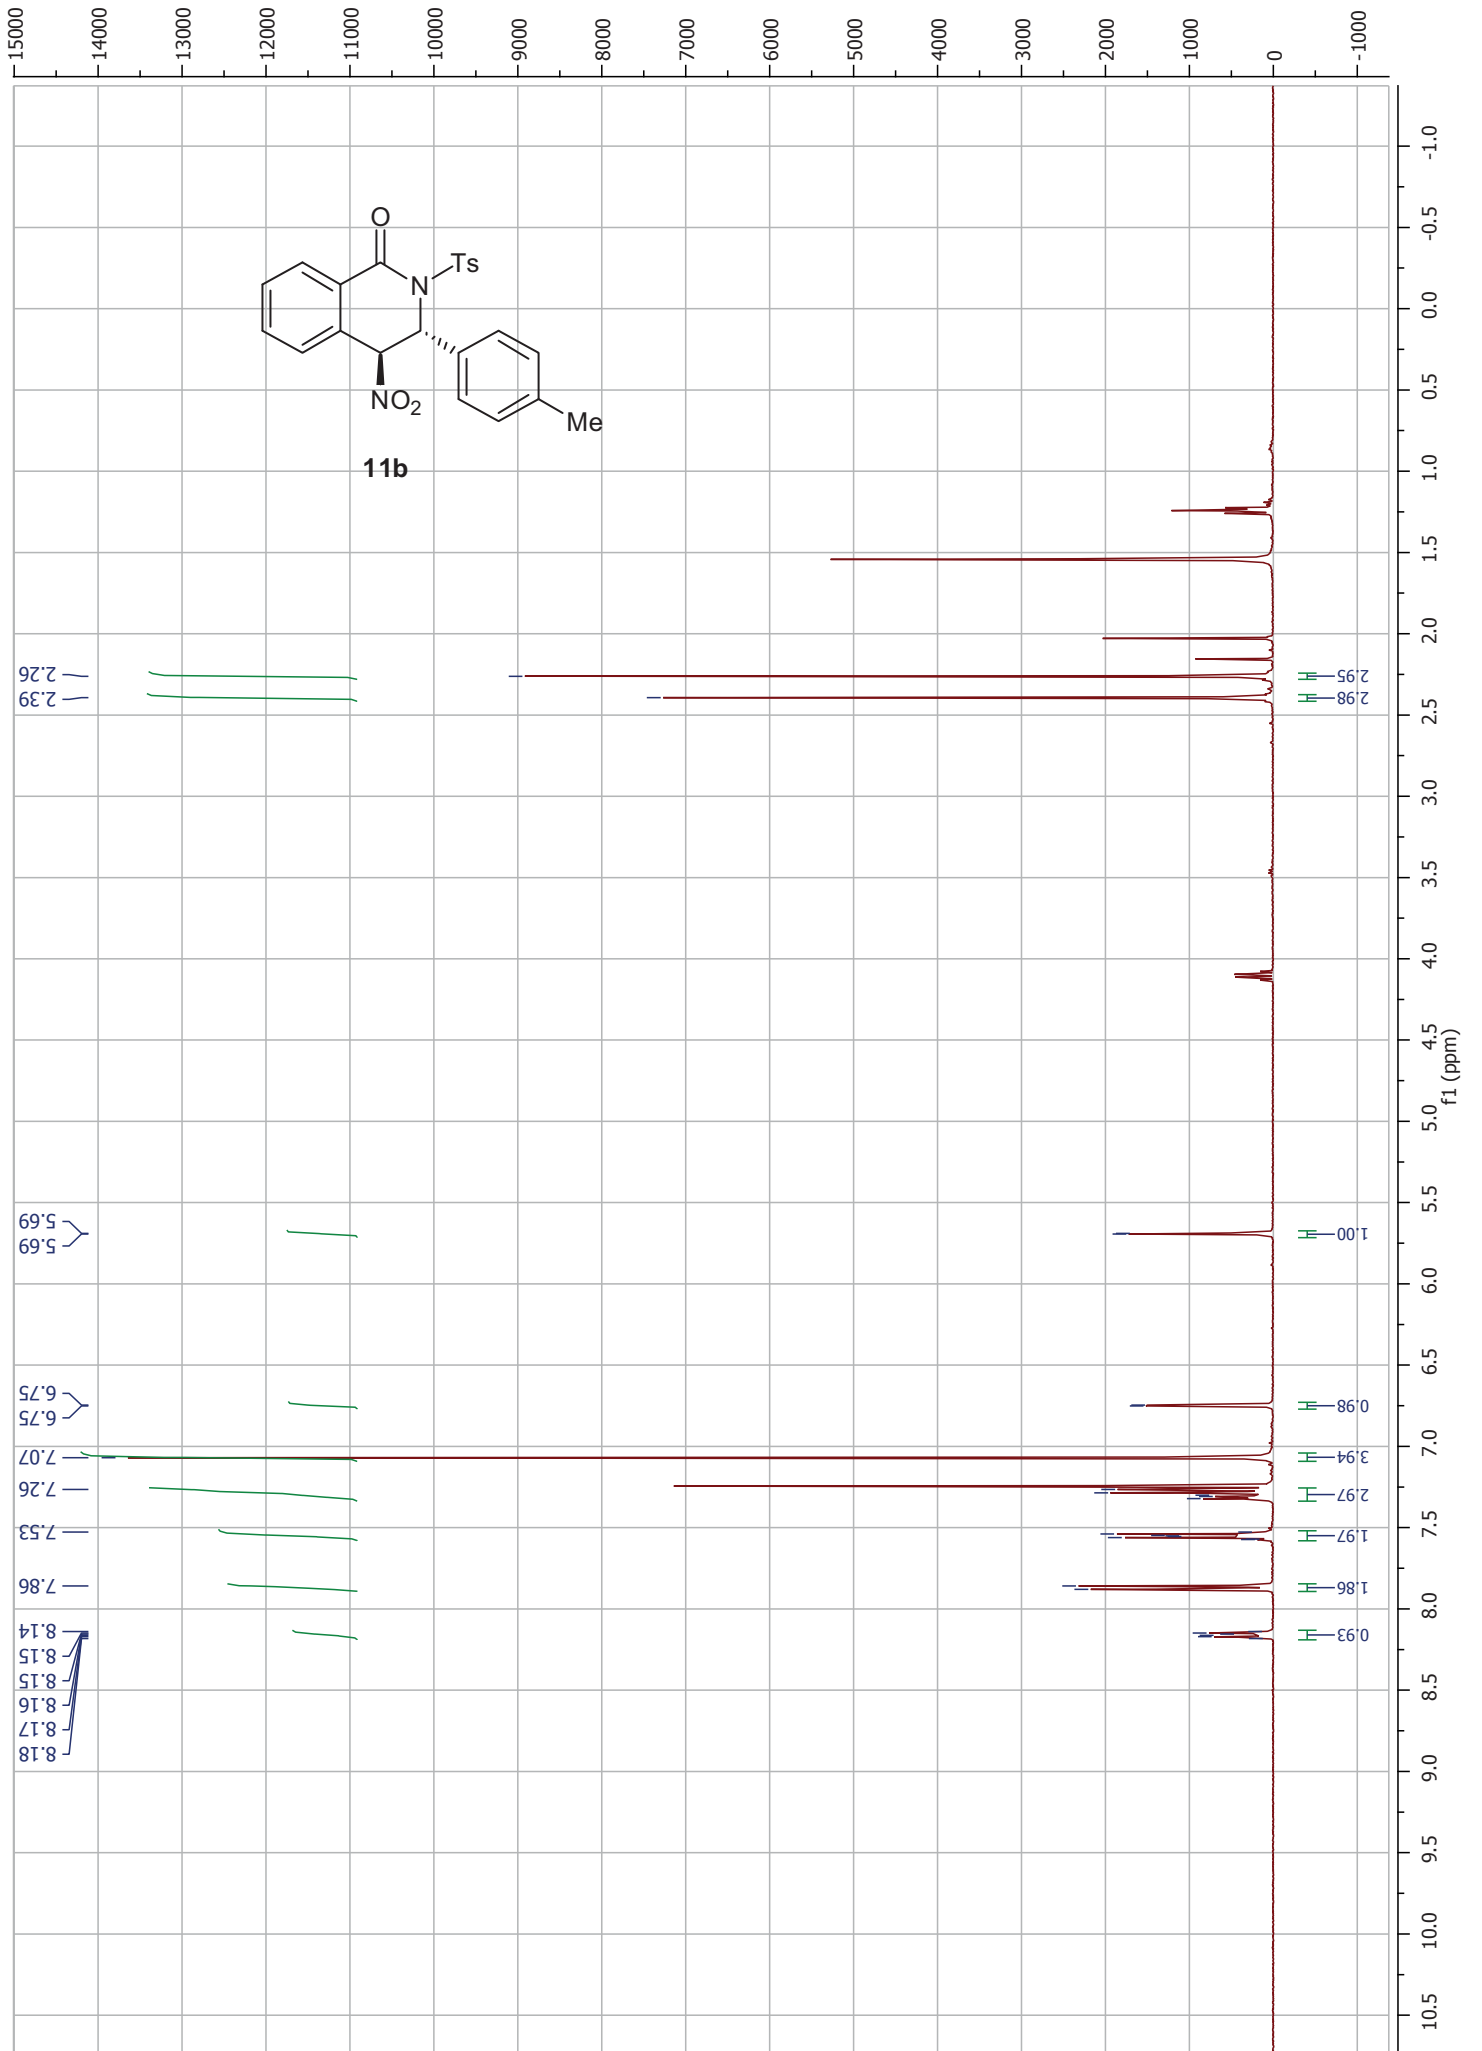

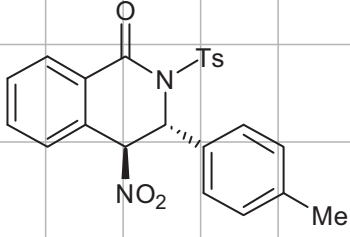

**11b**

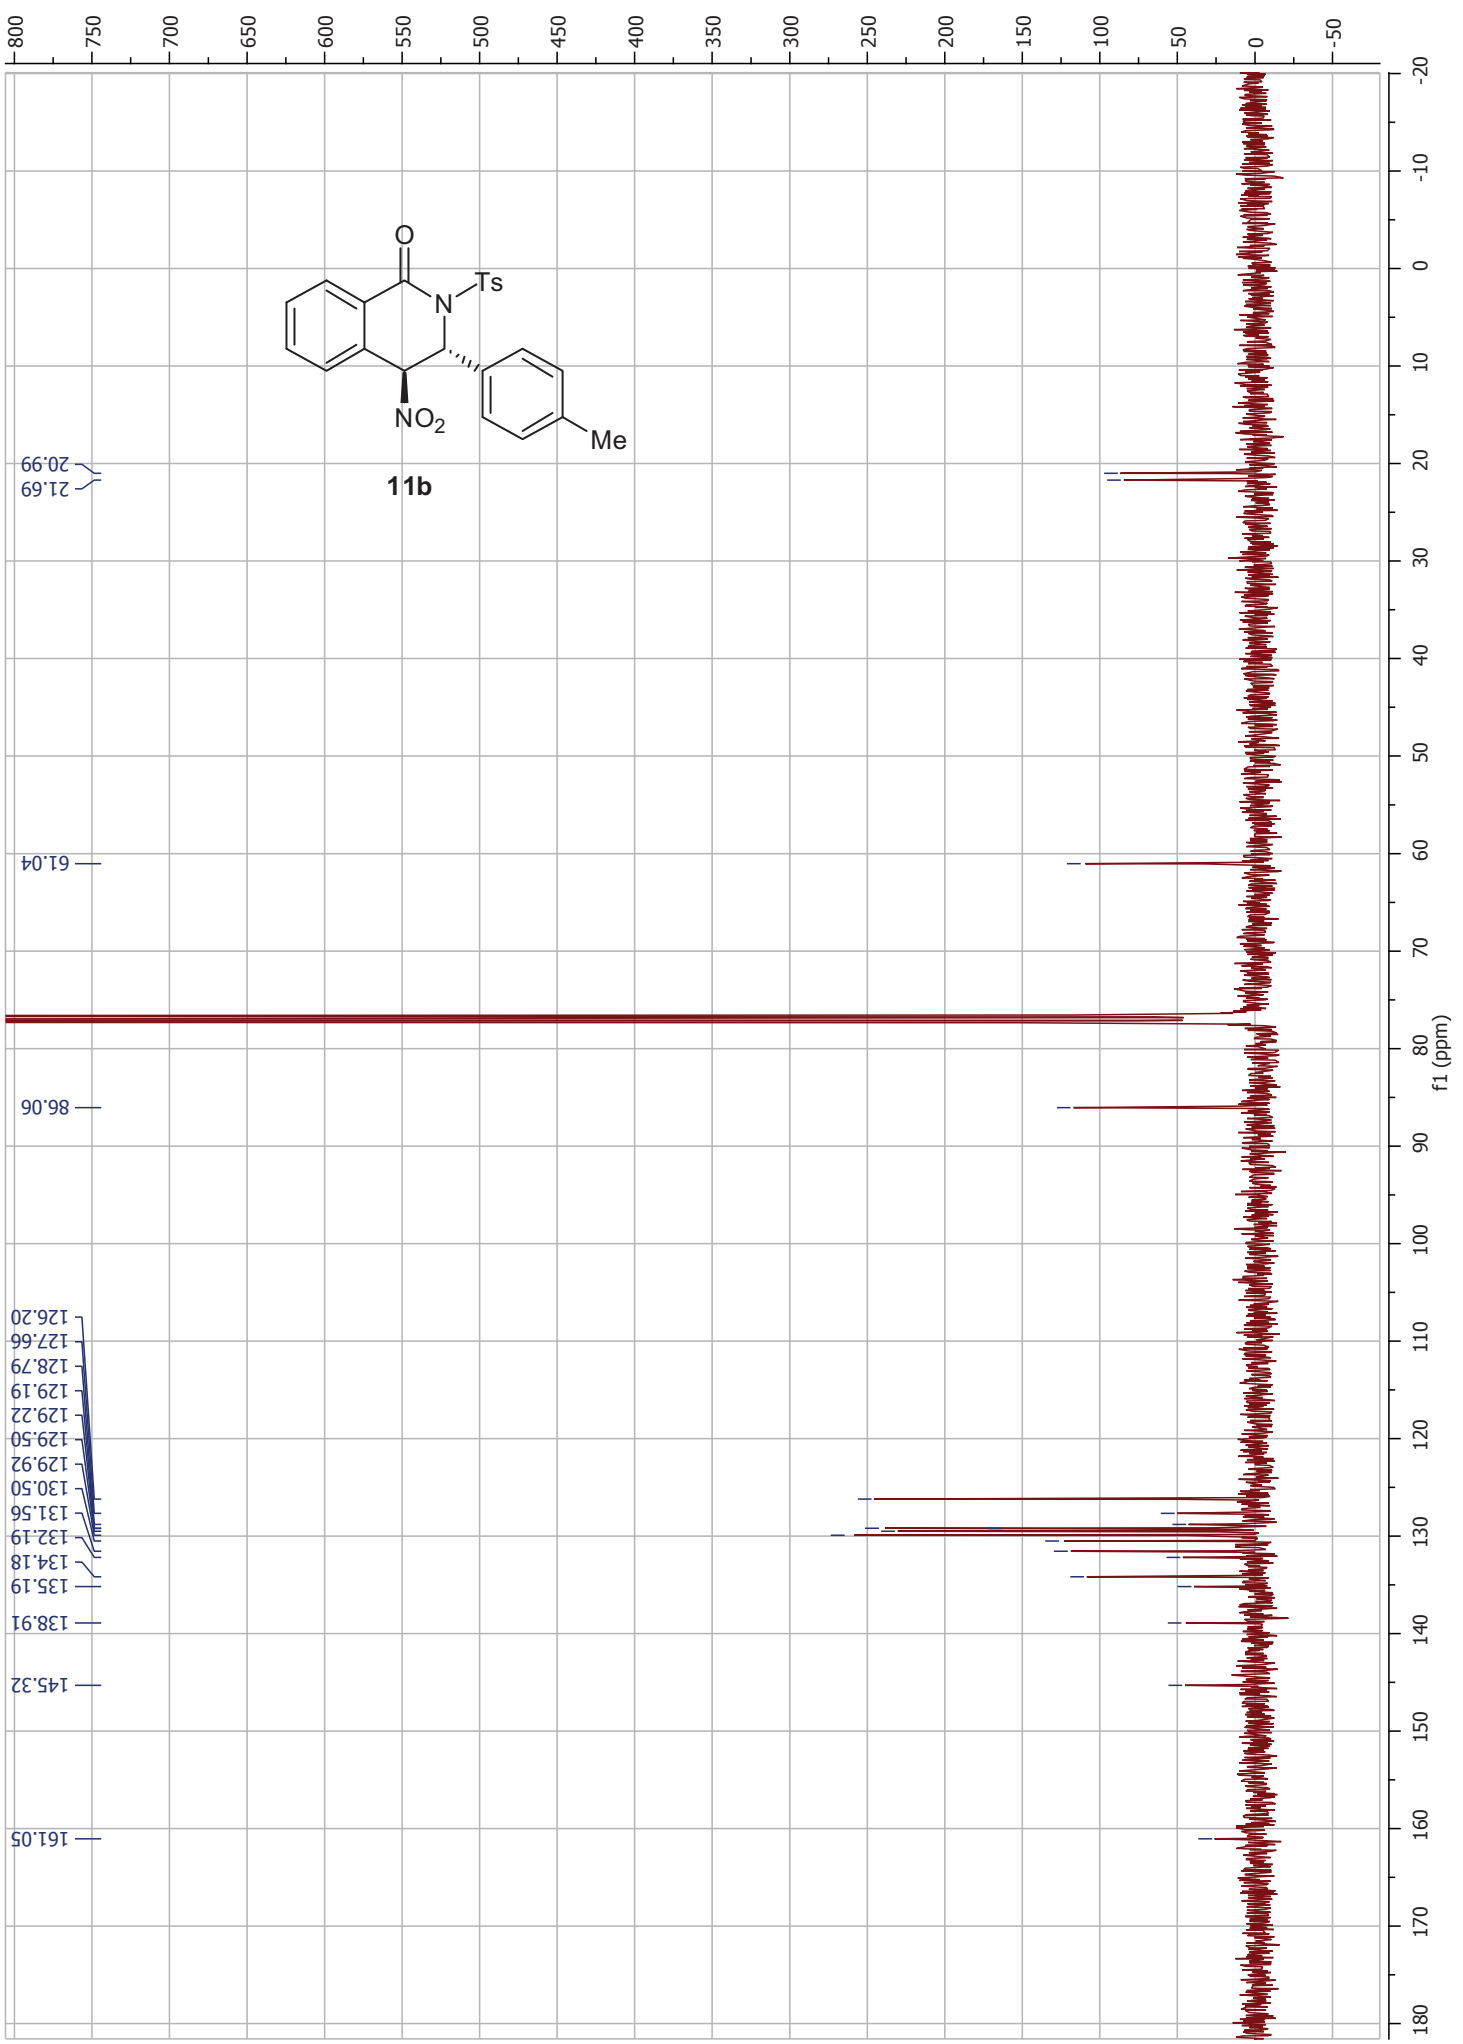

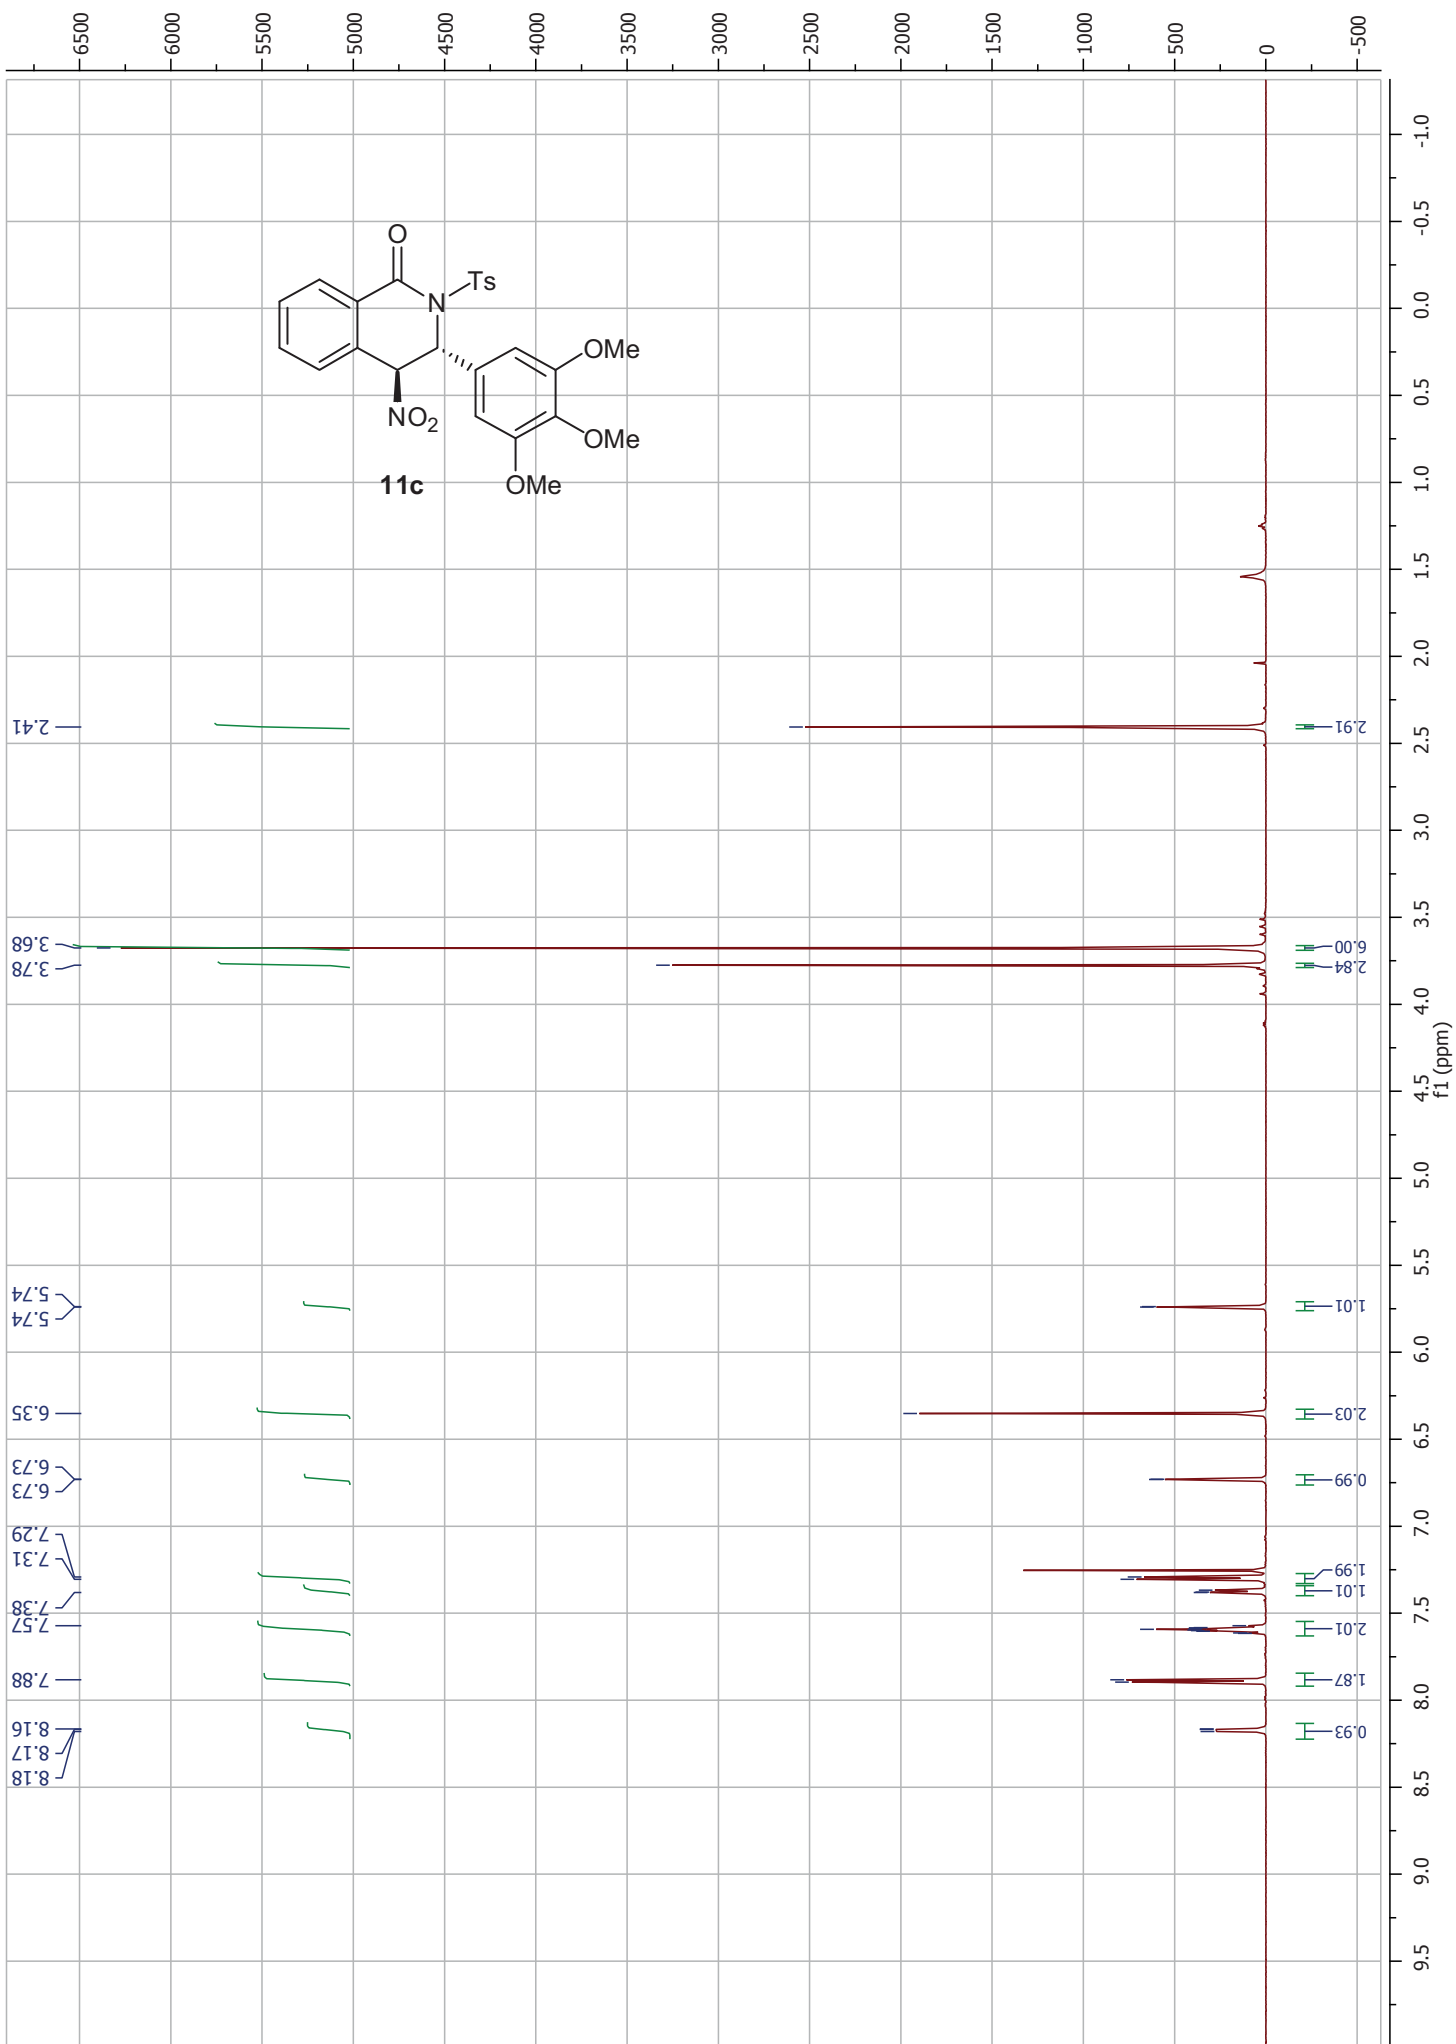

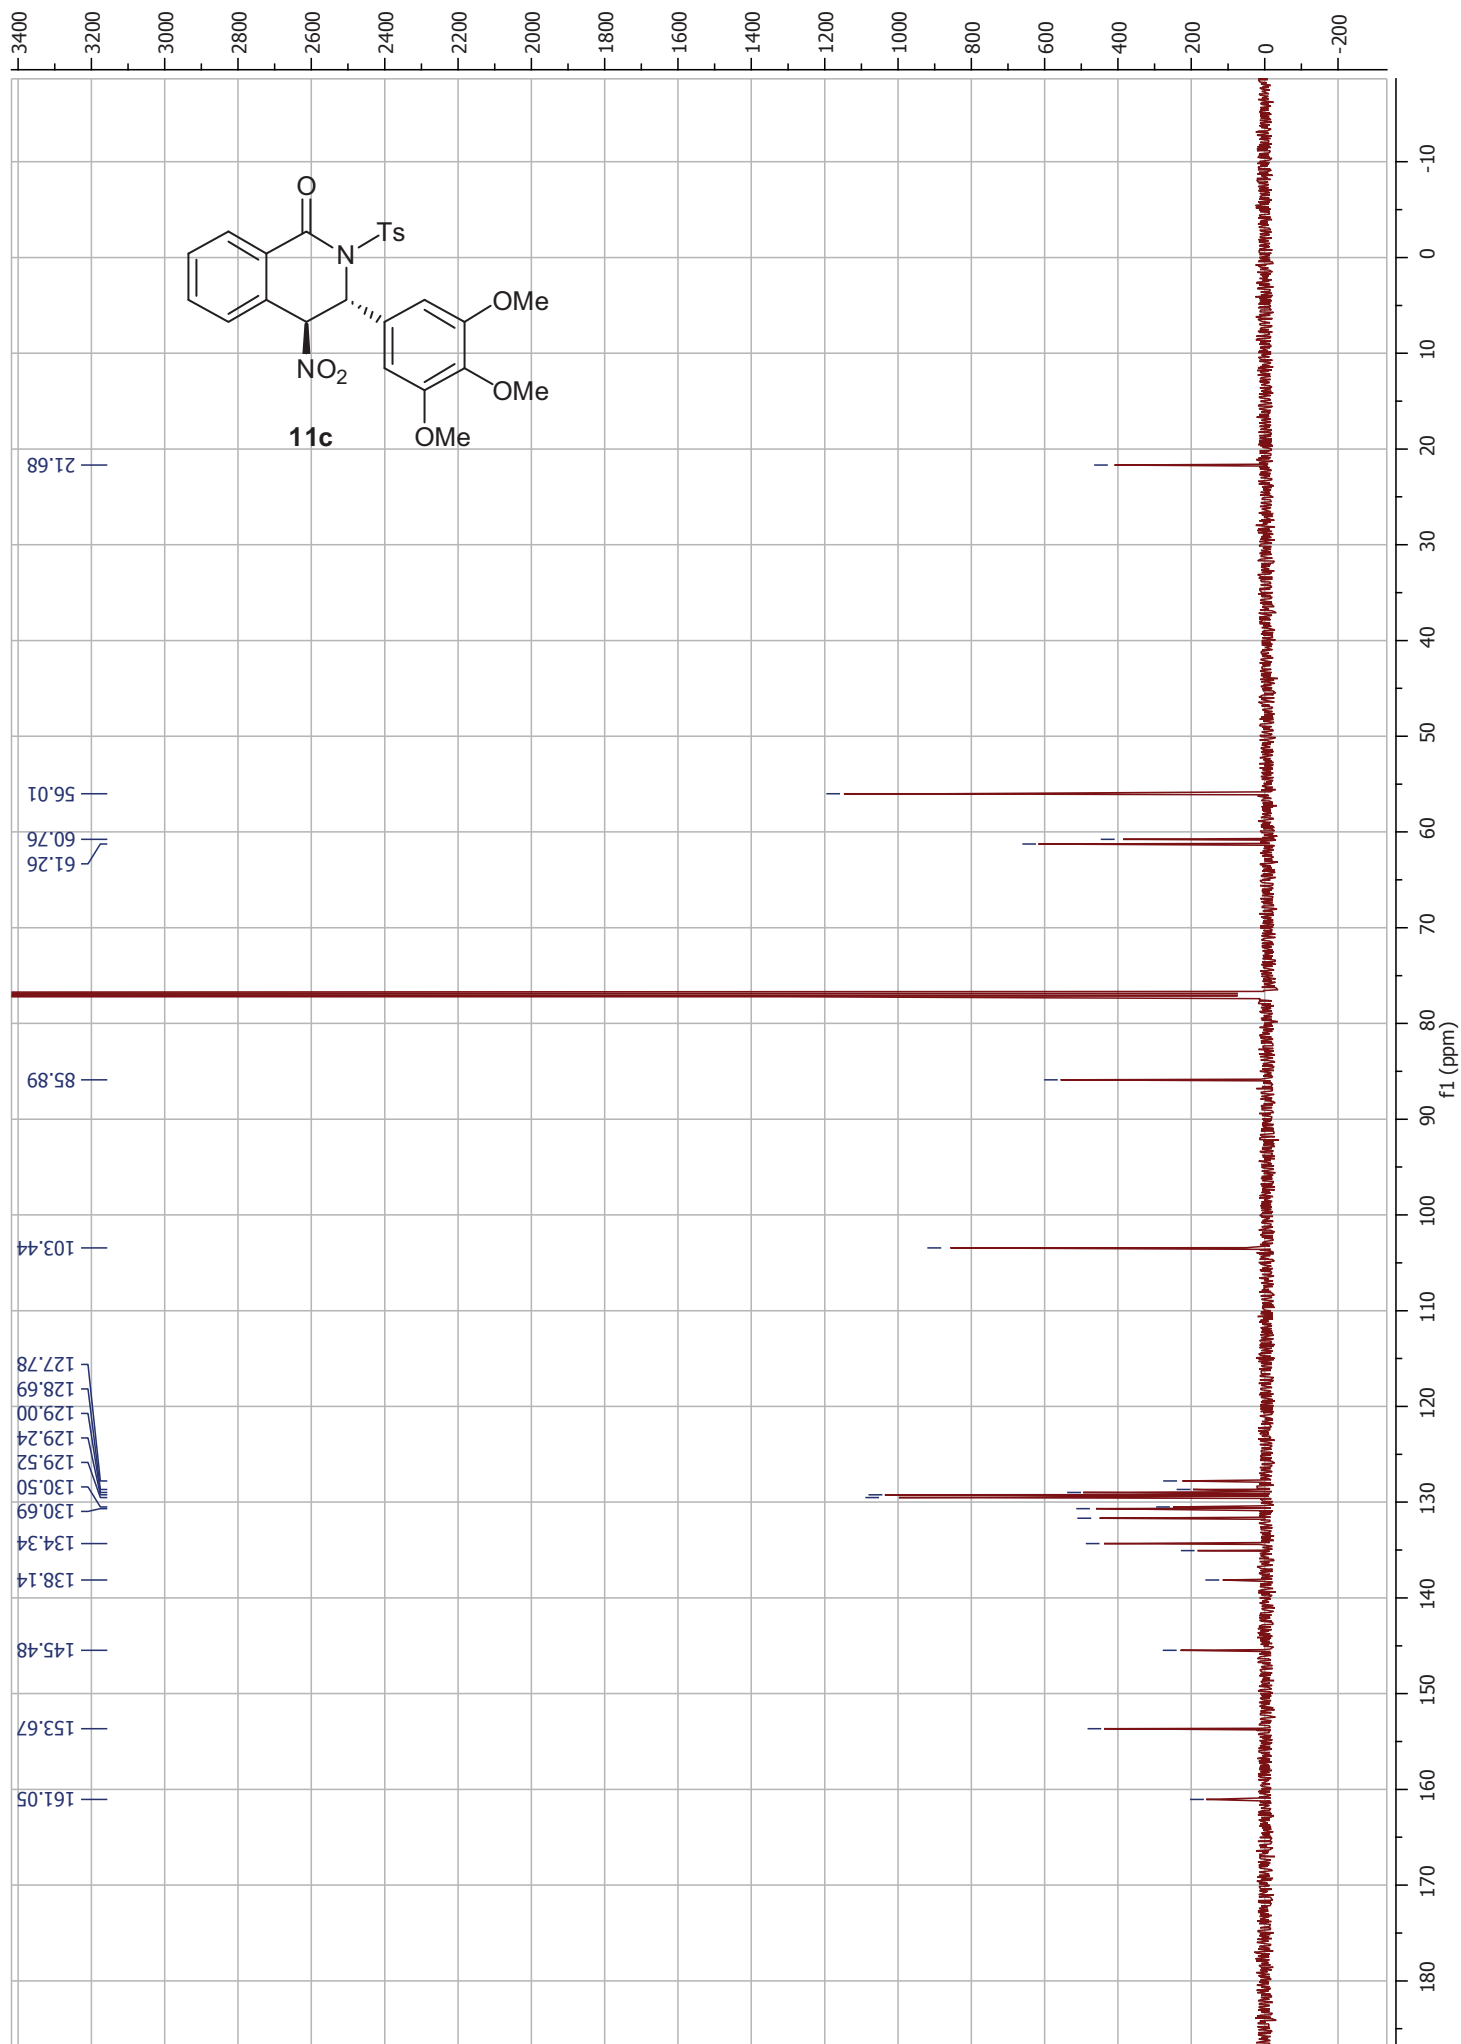



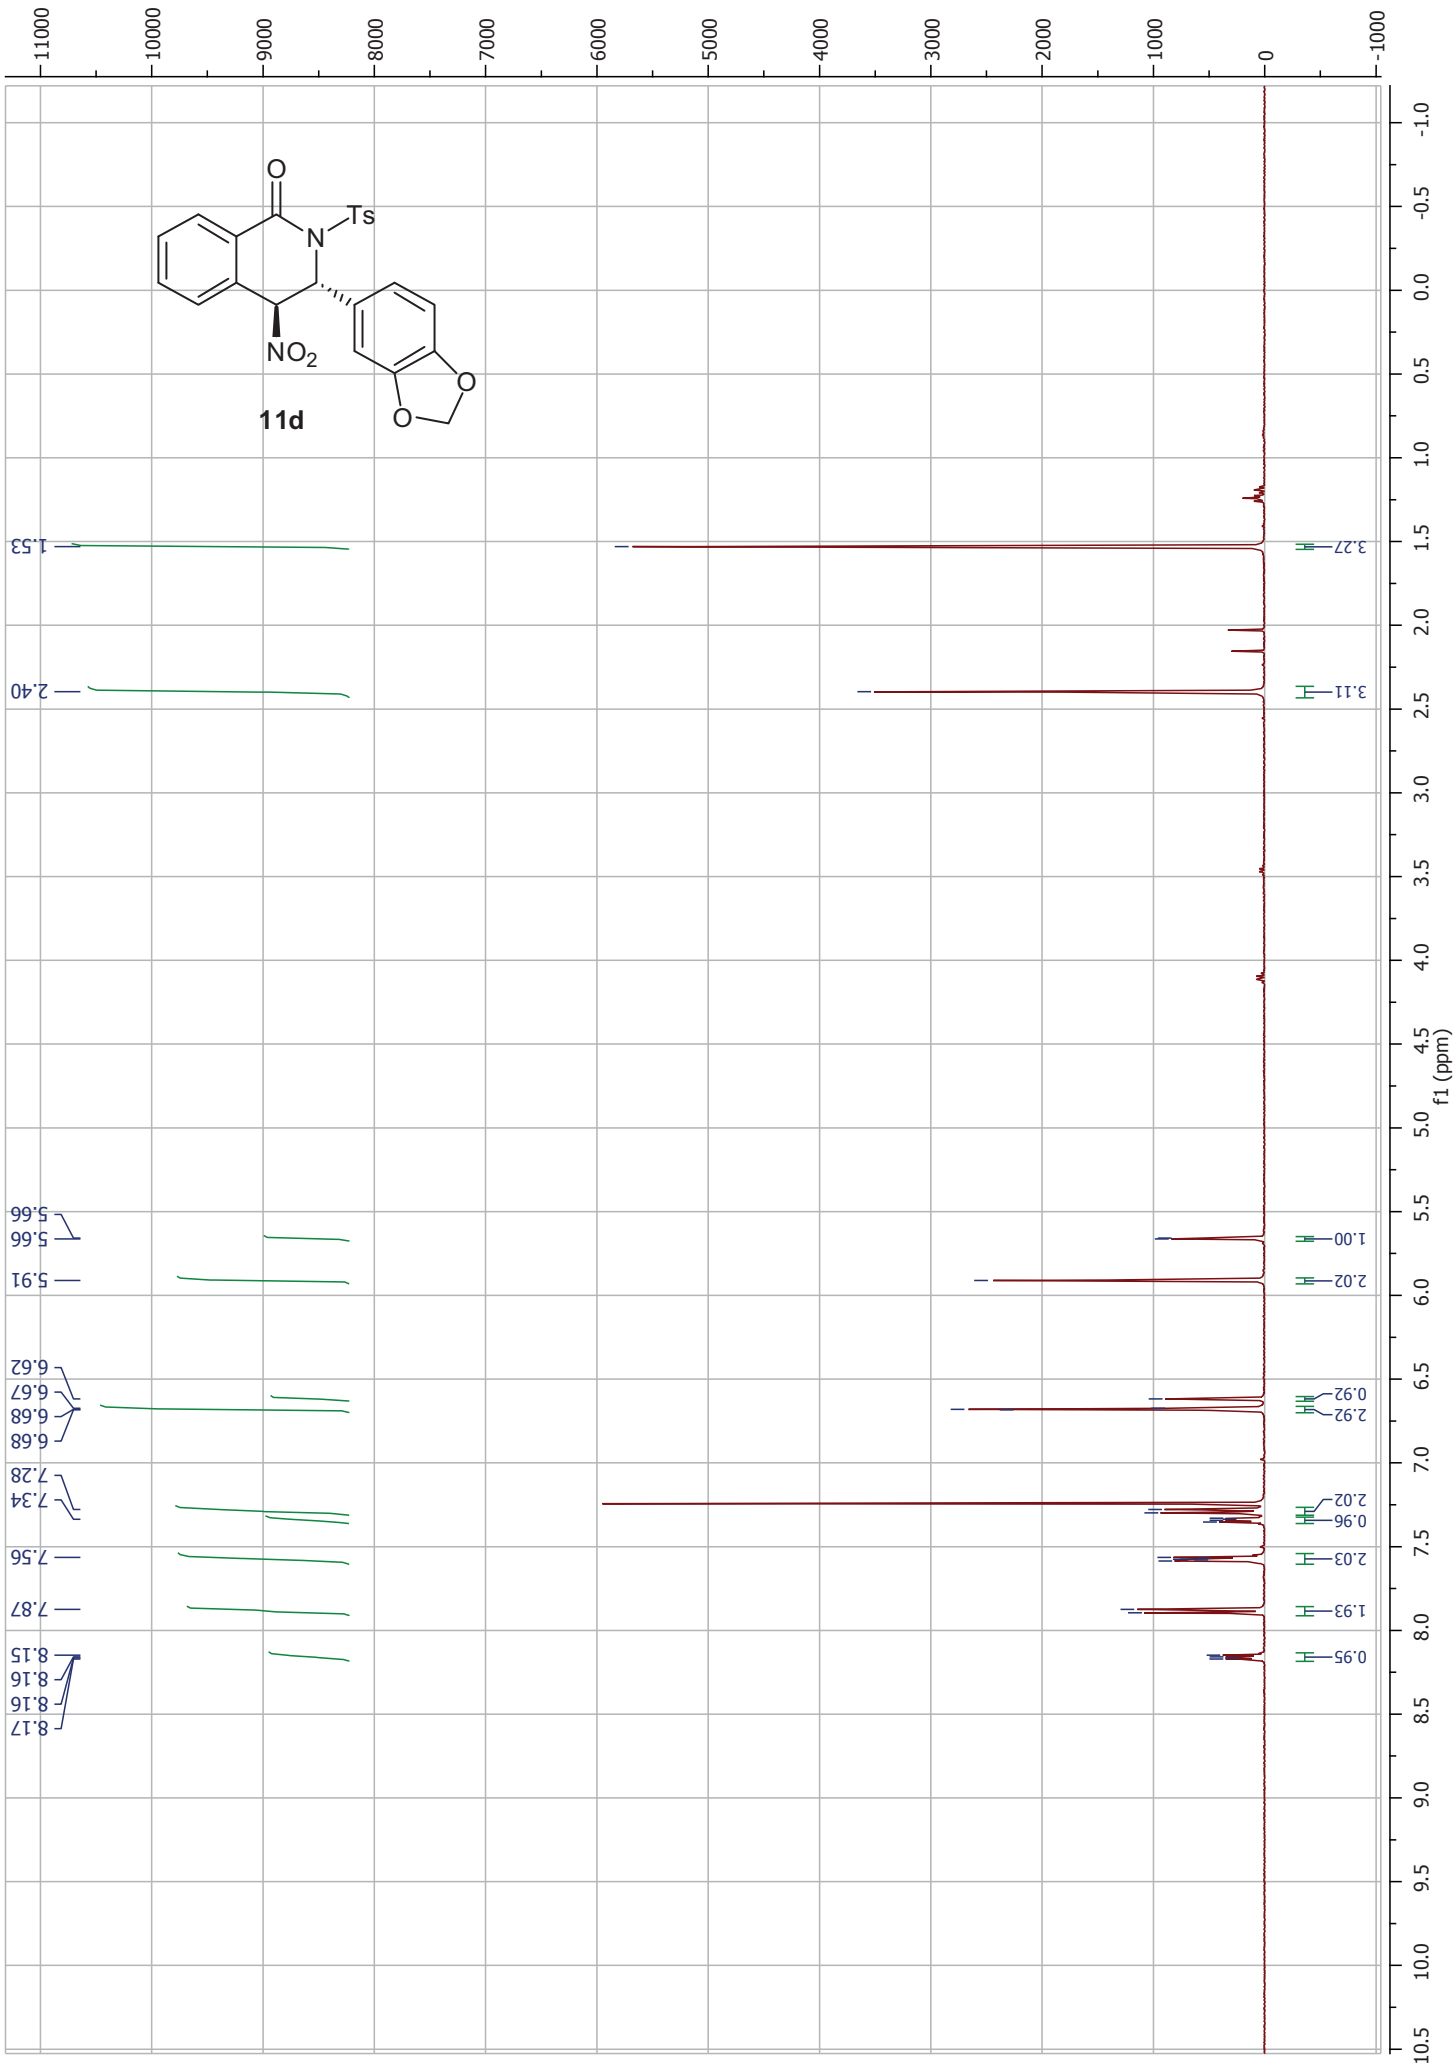

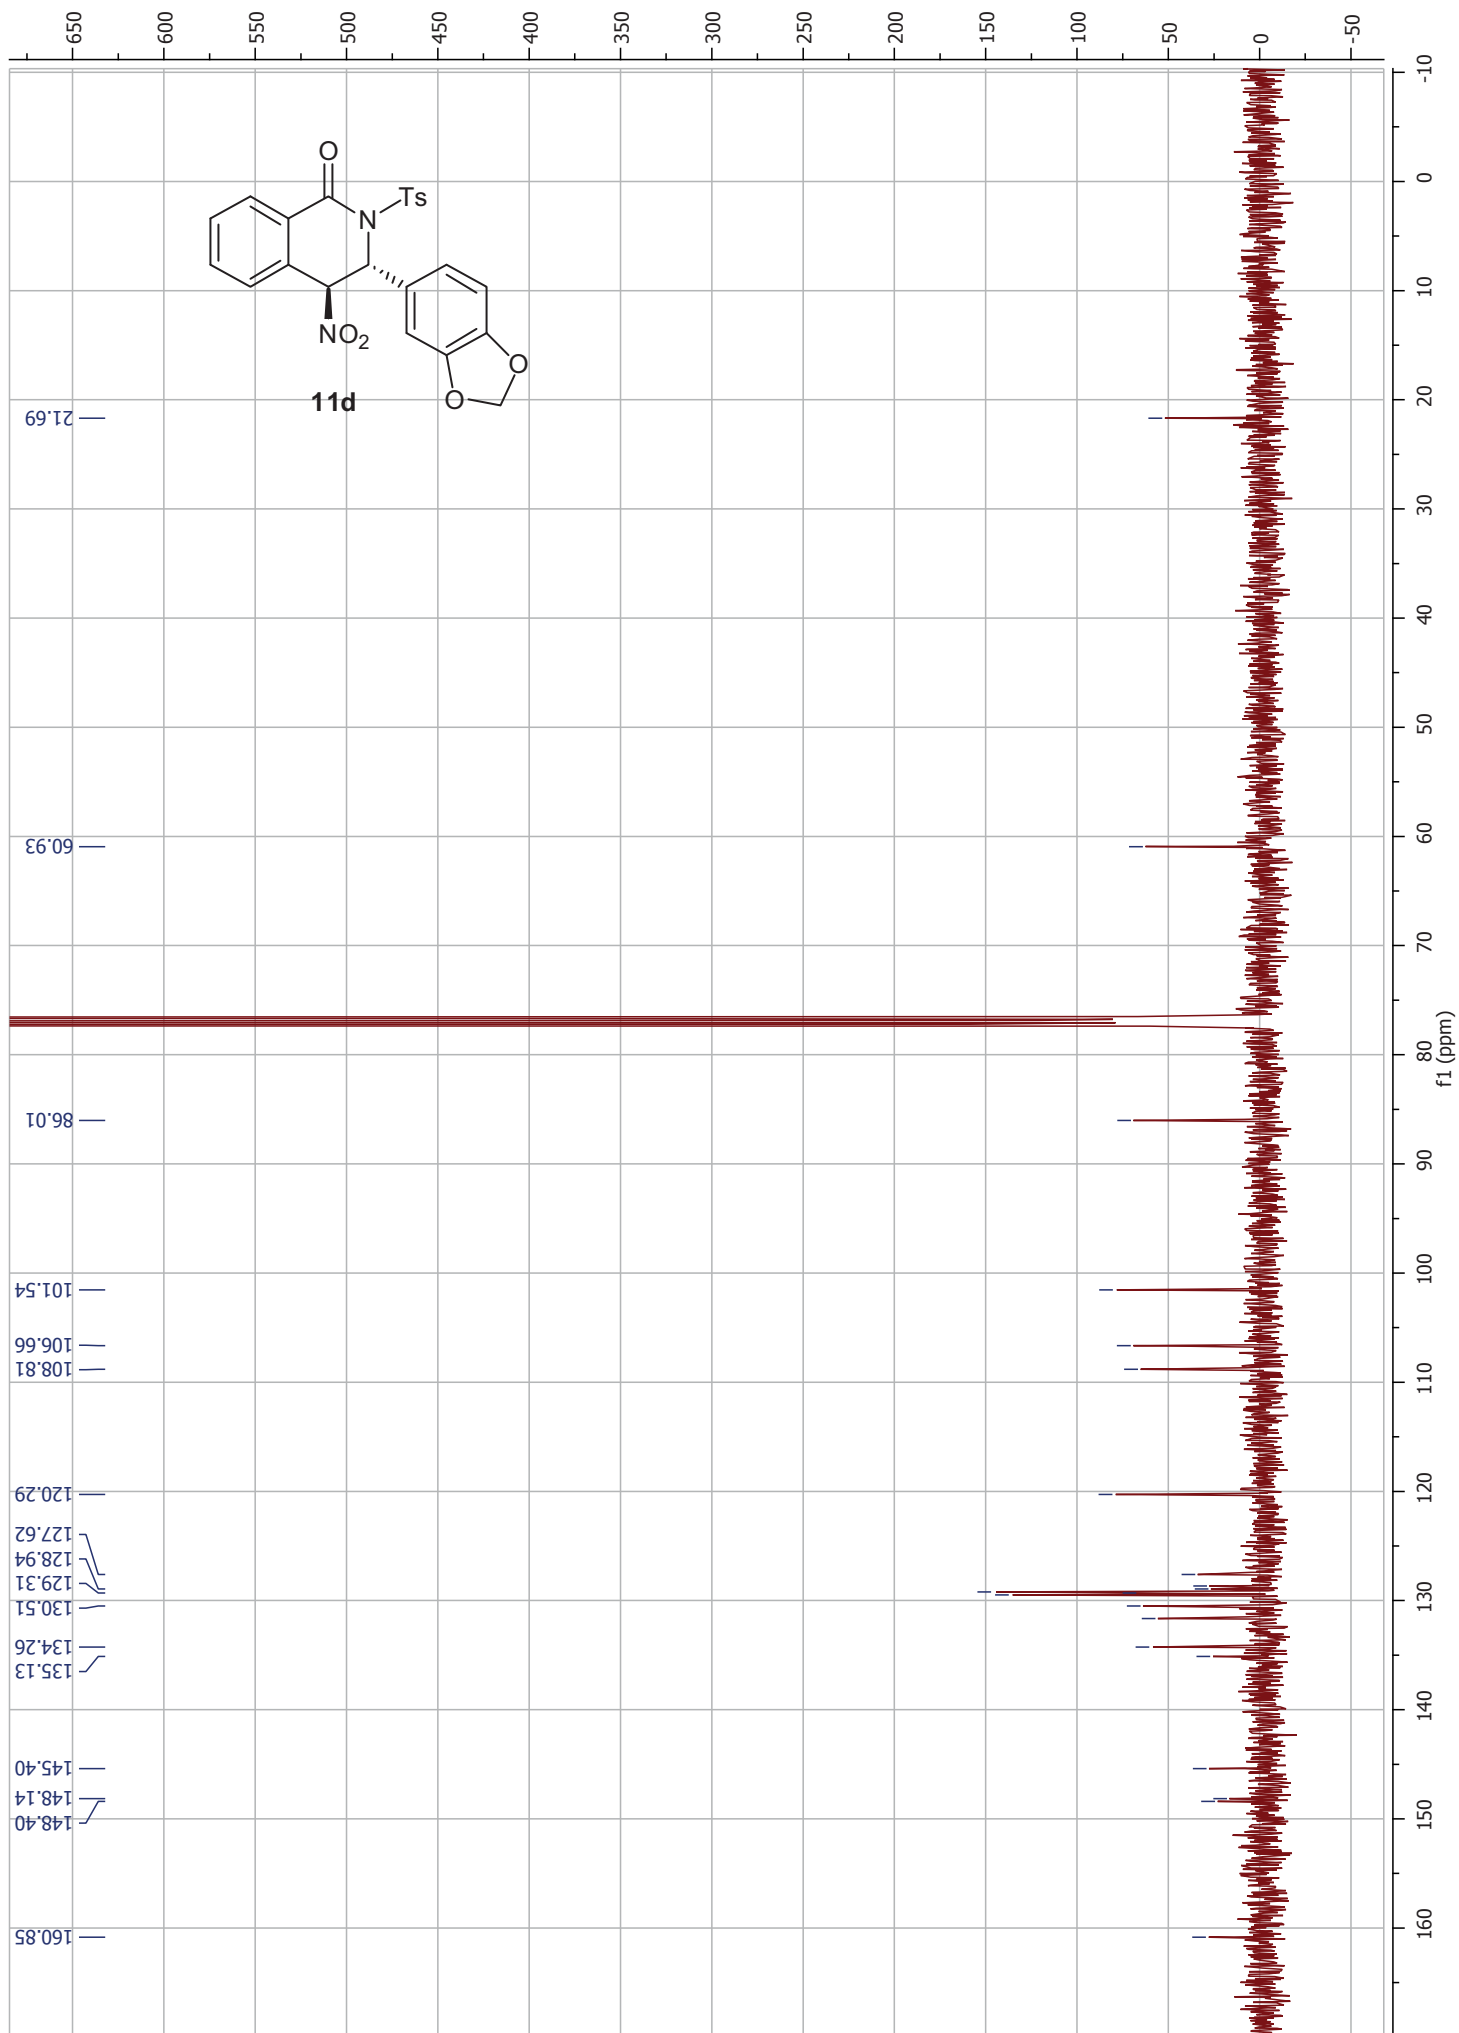

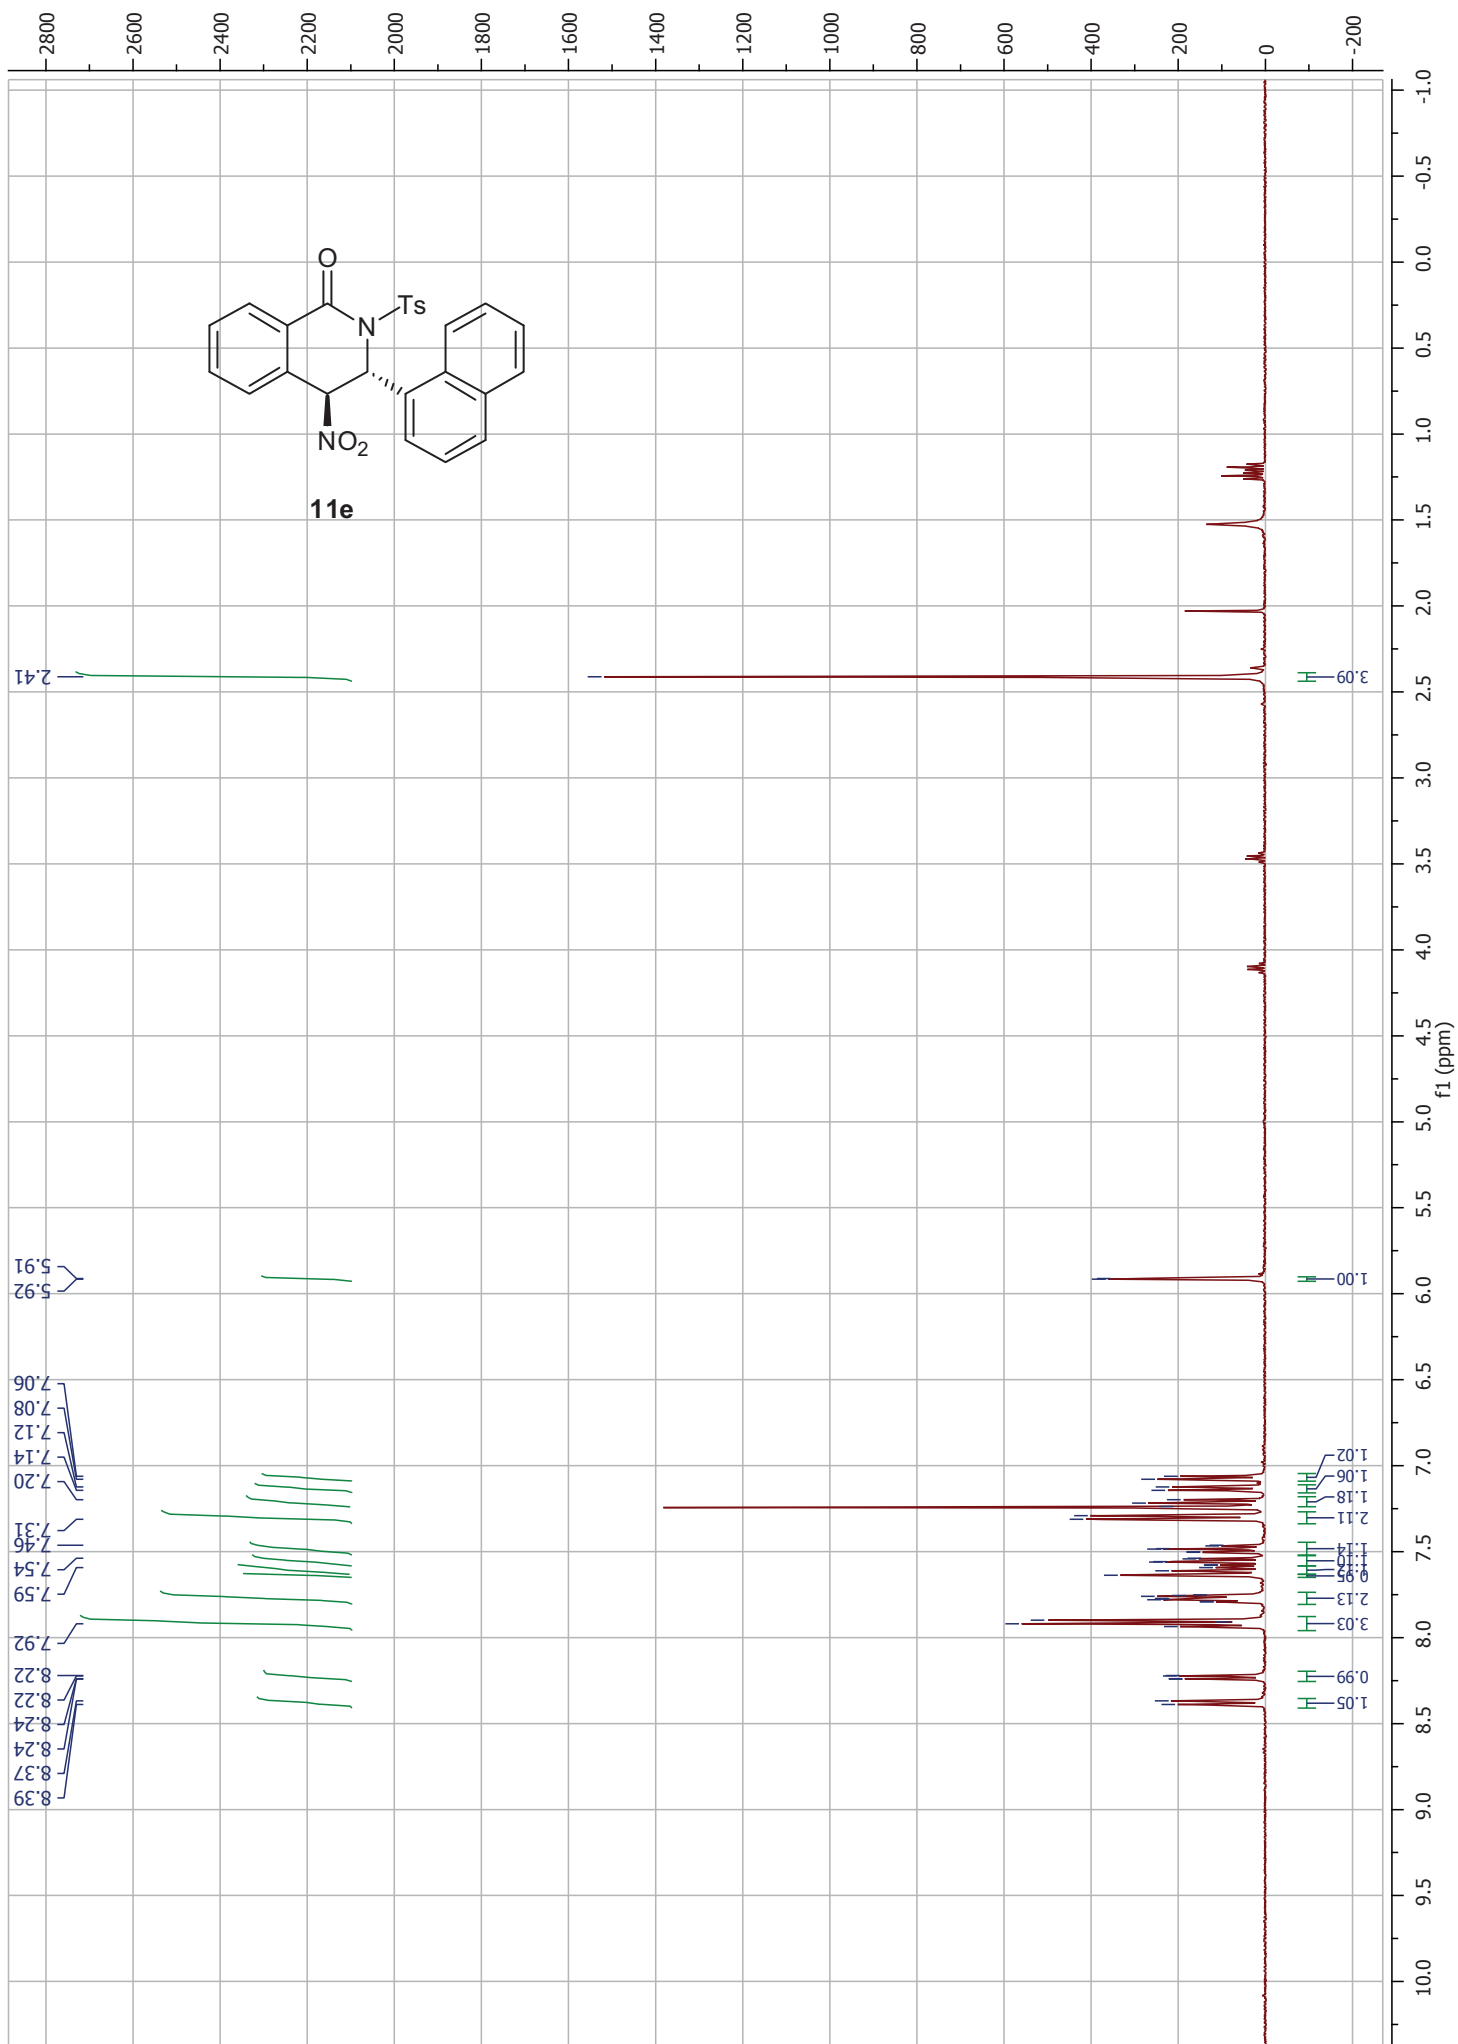

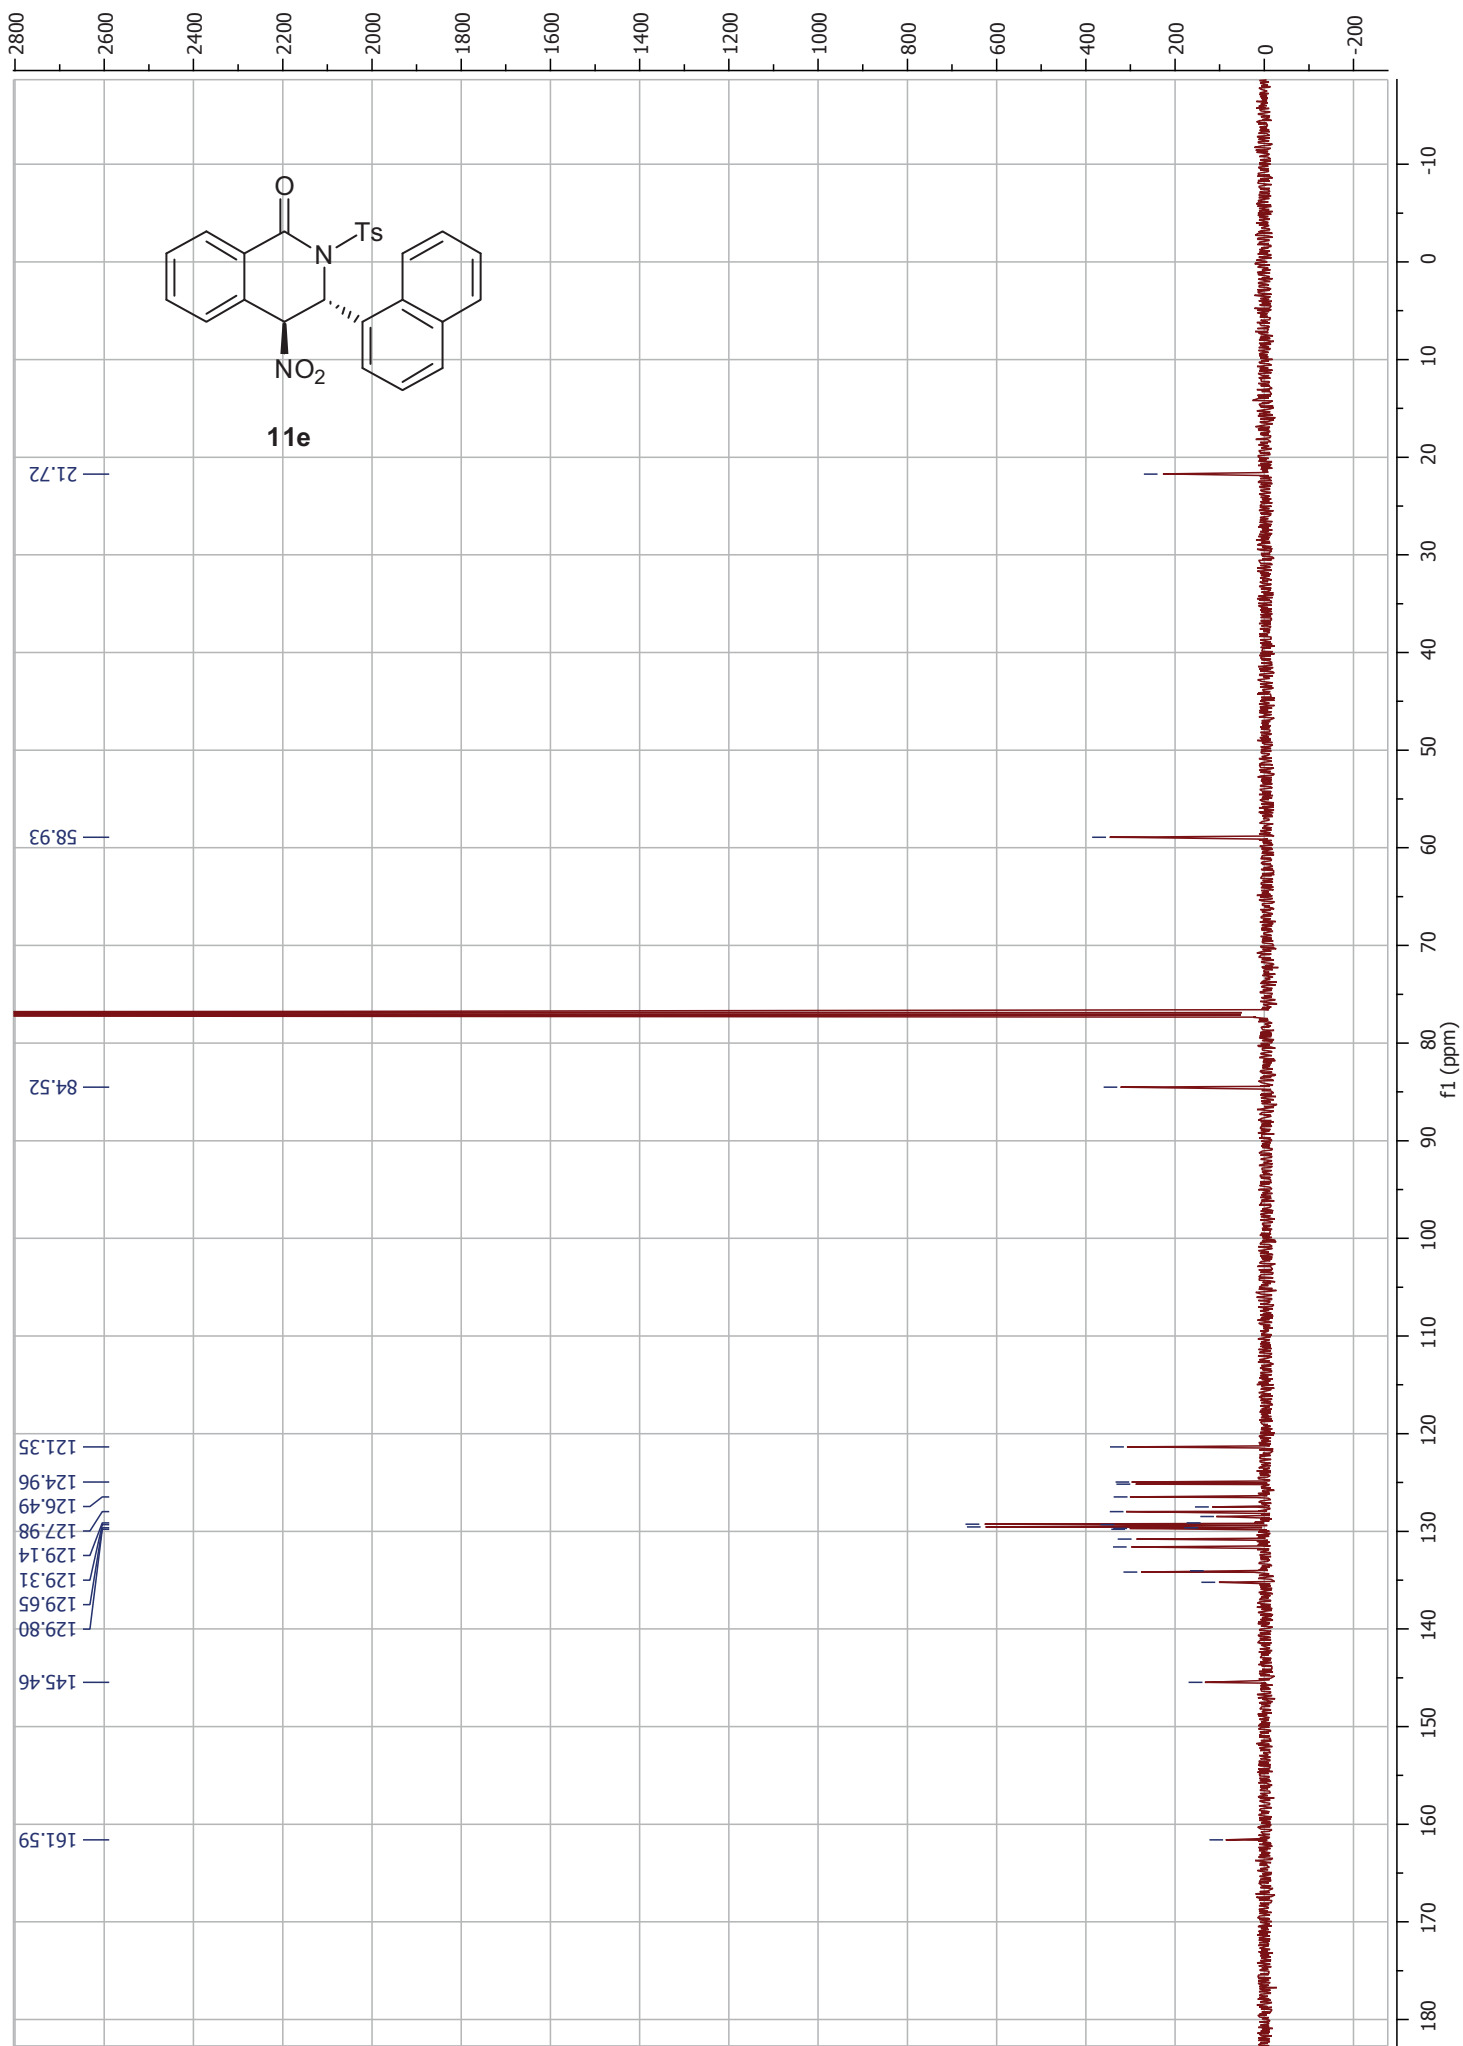

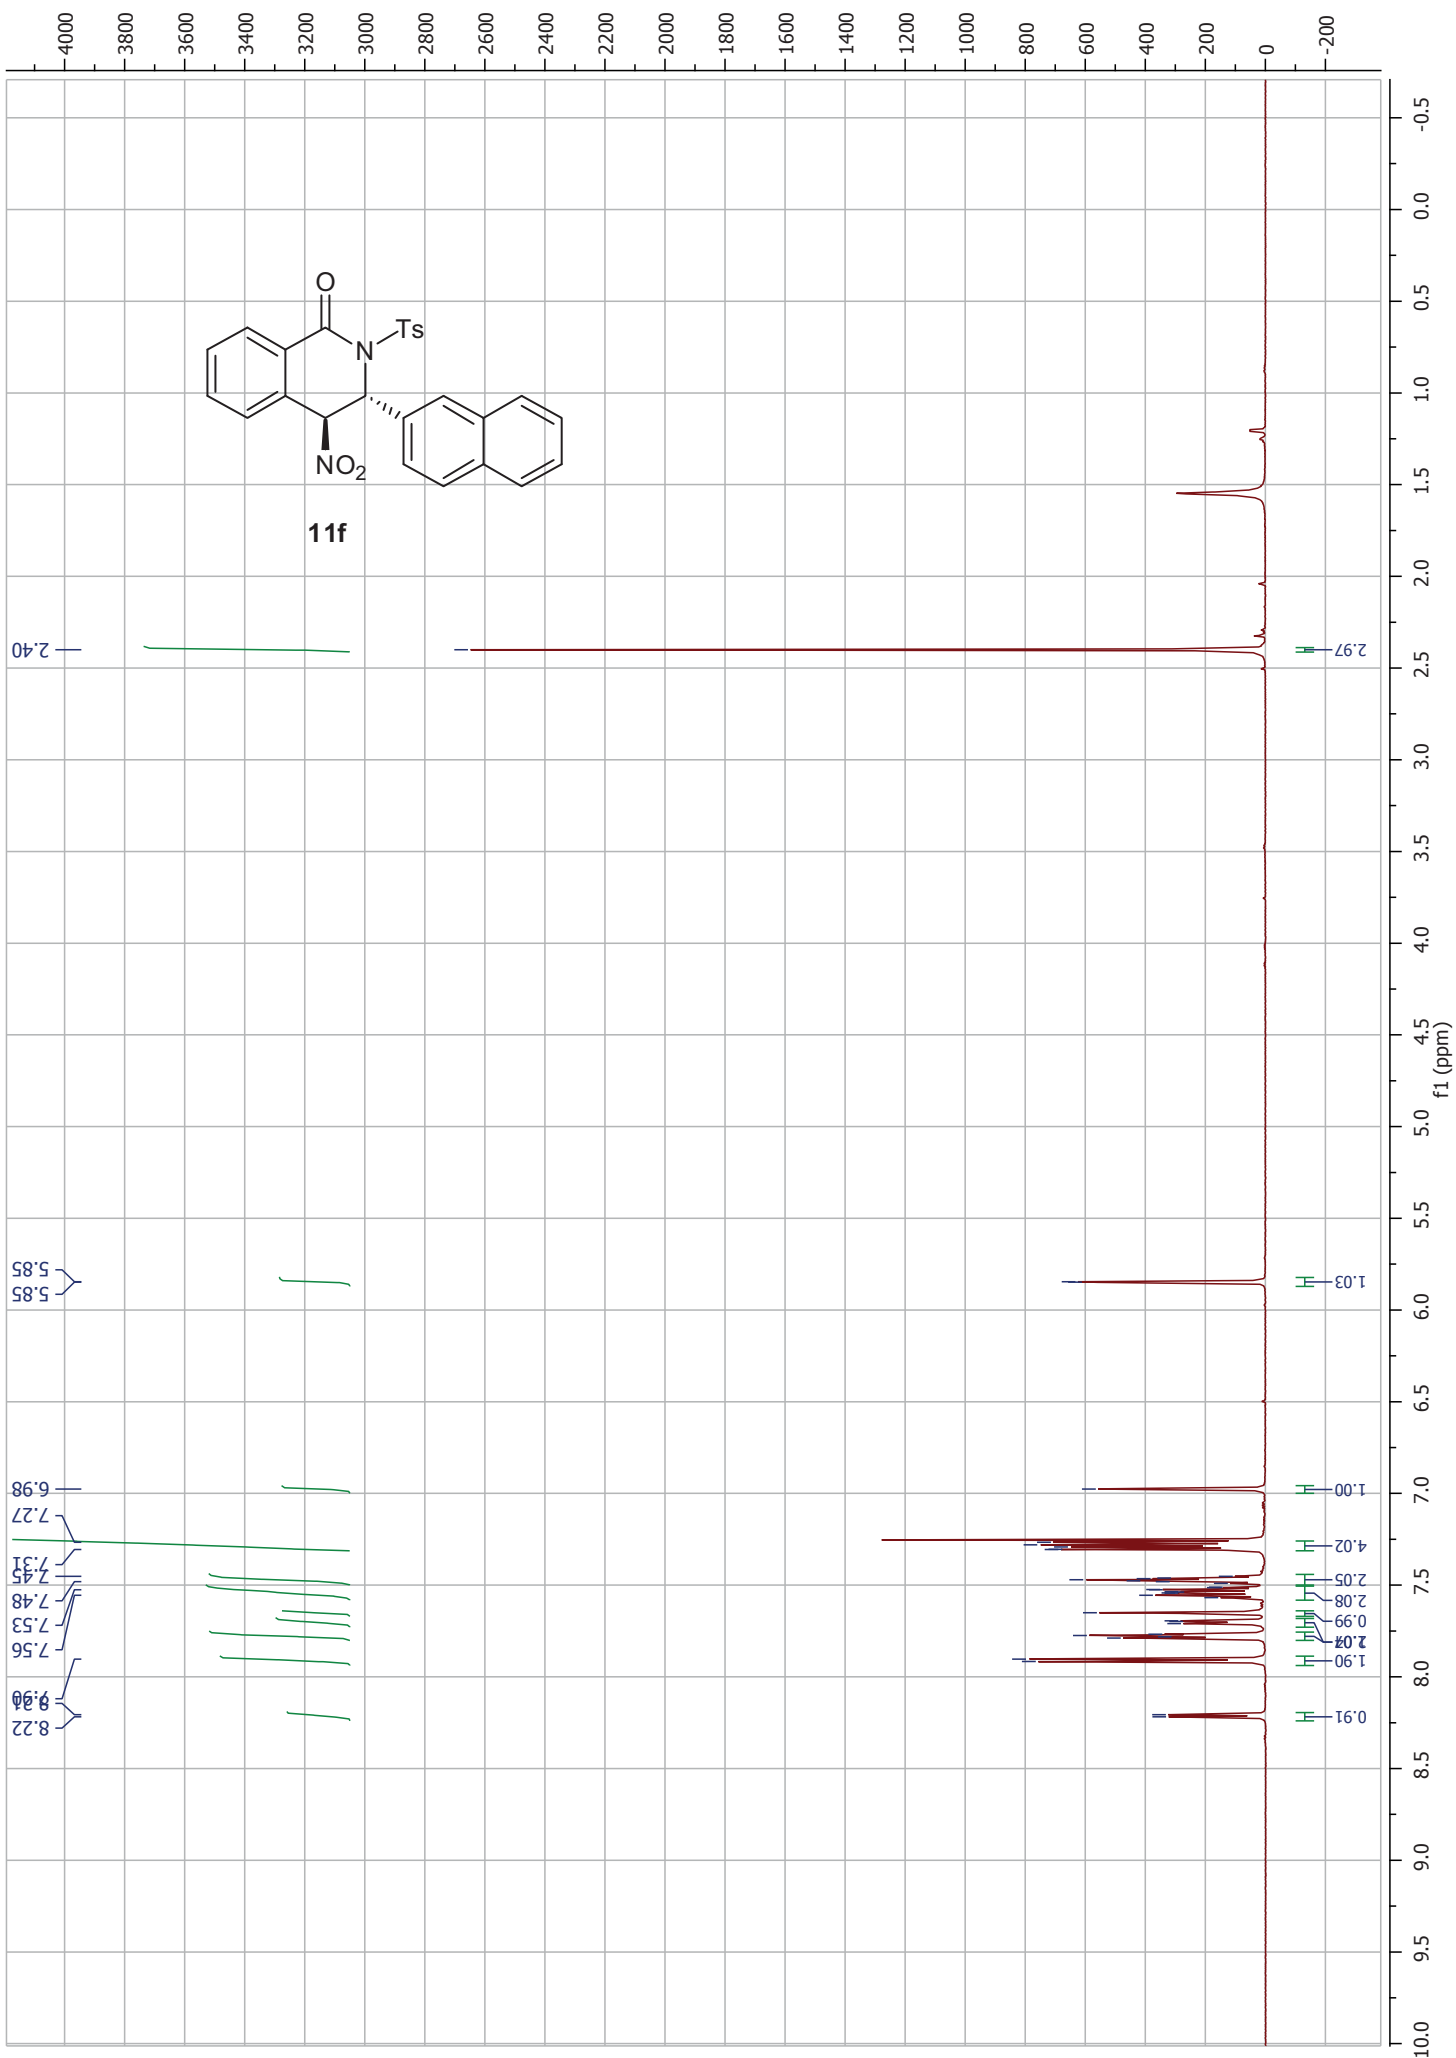

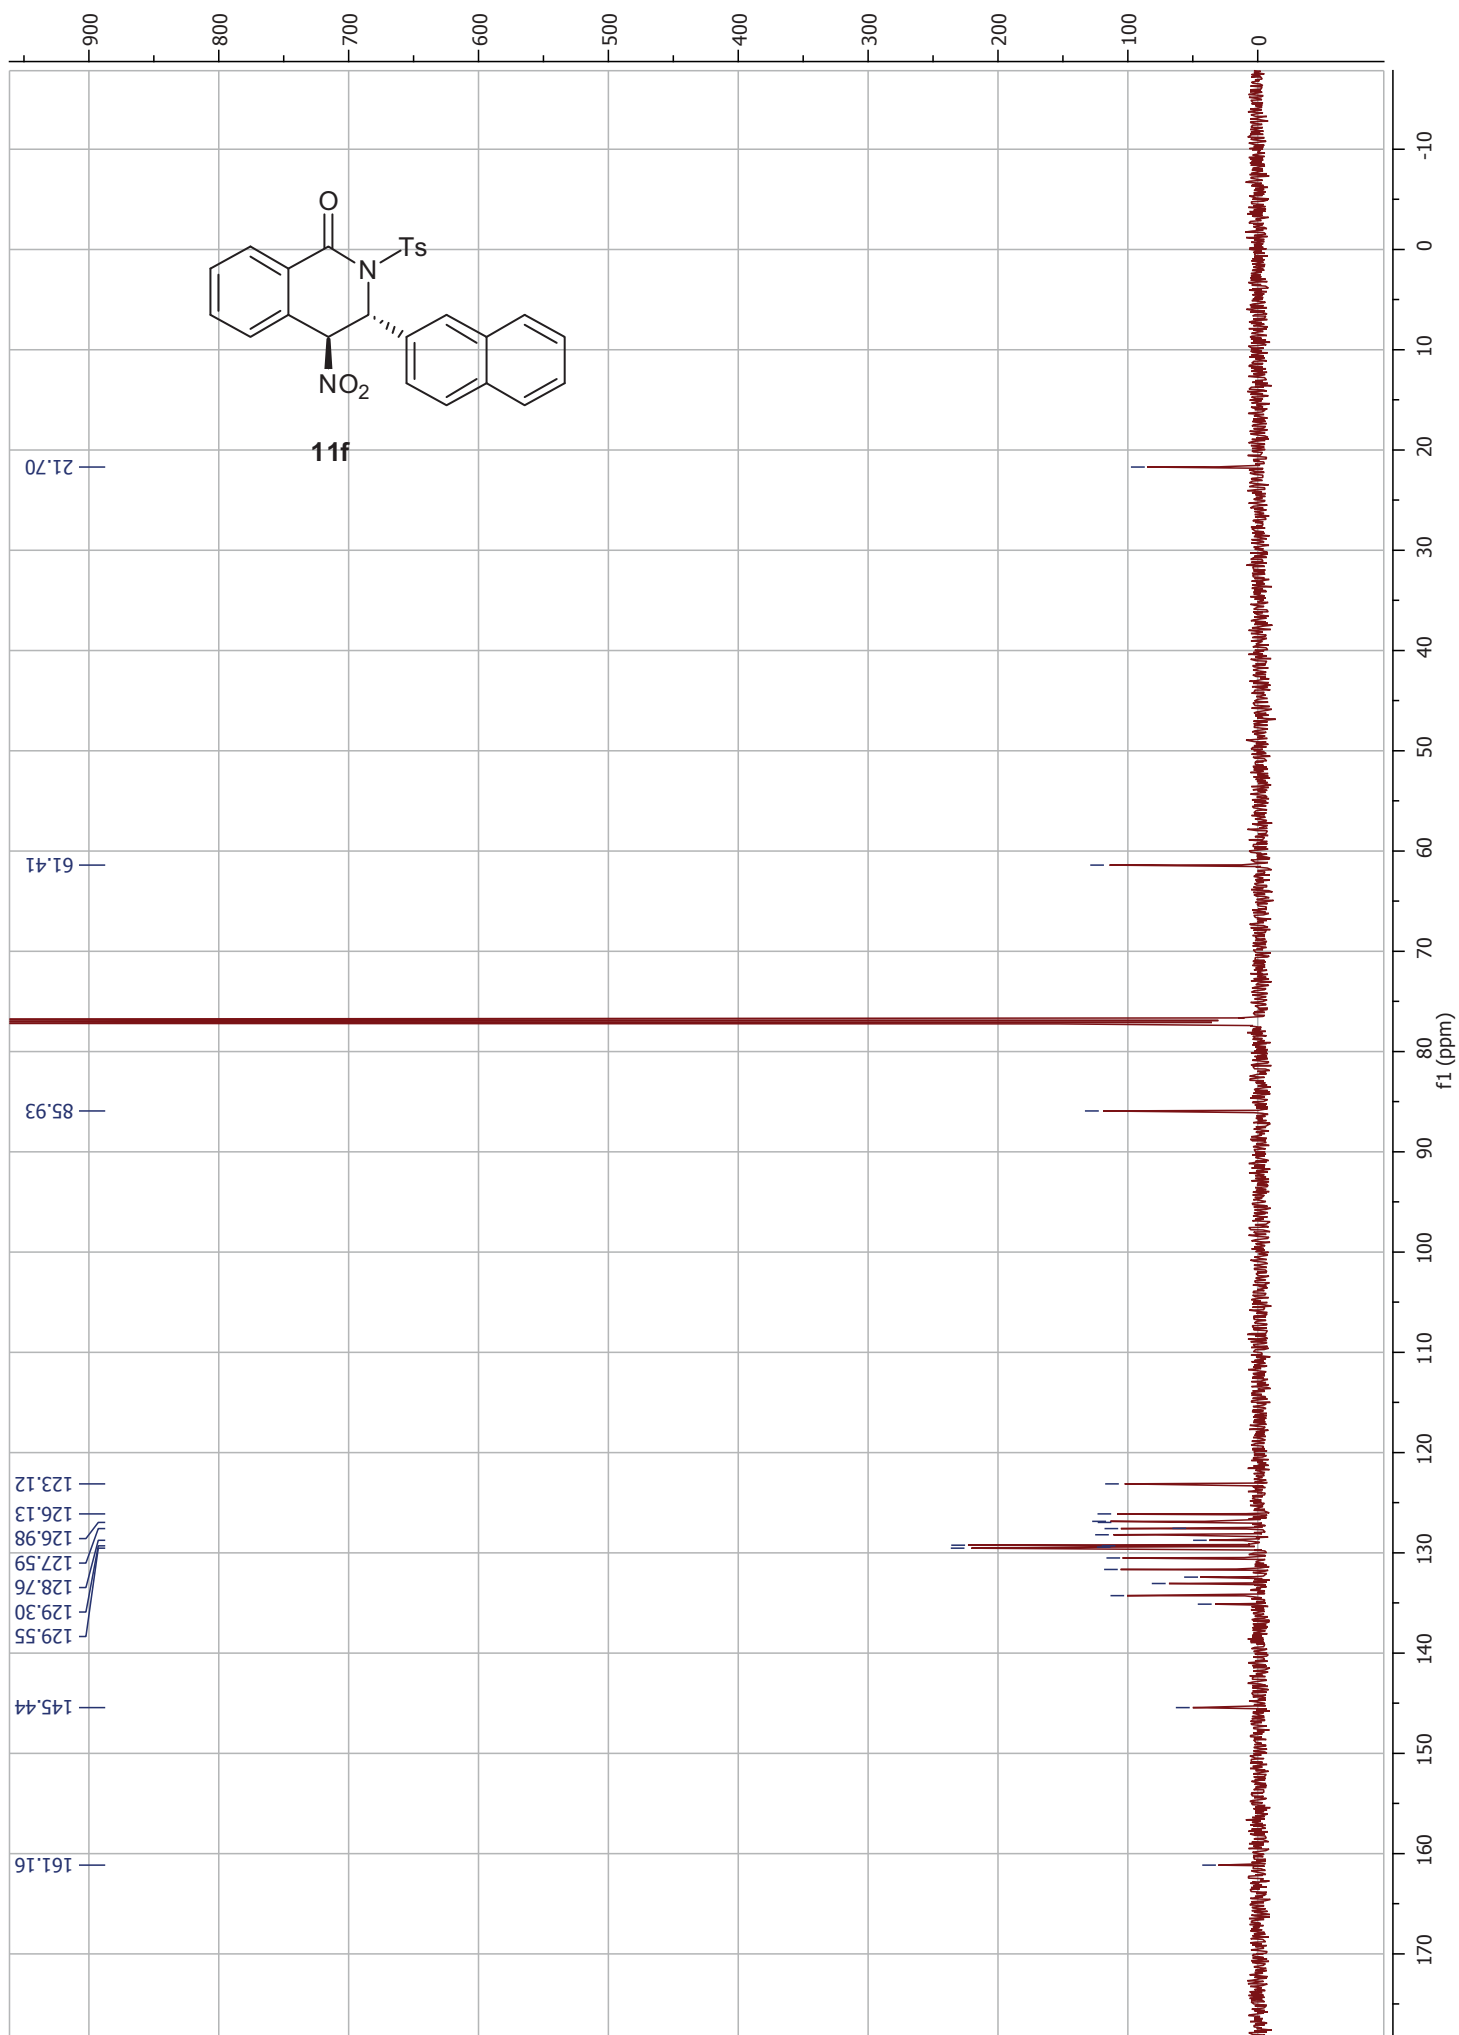

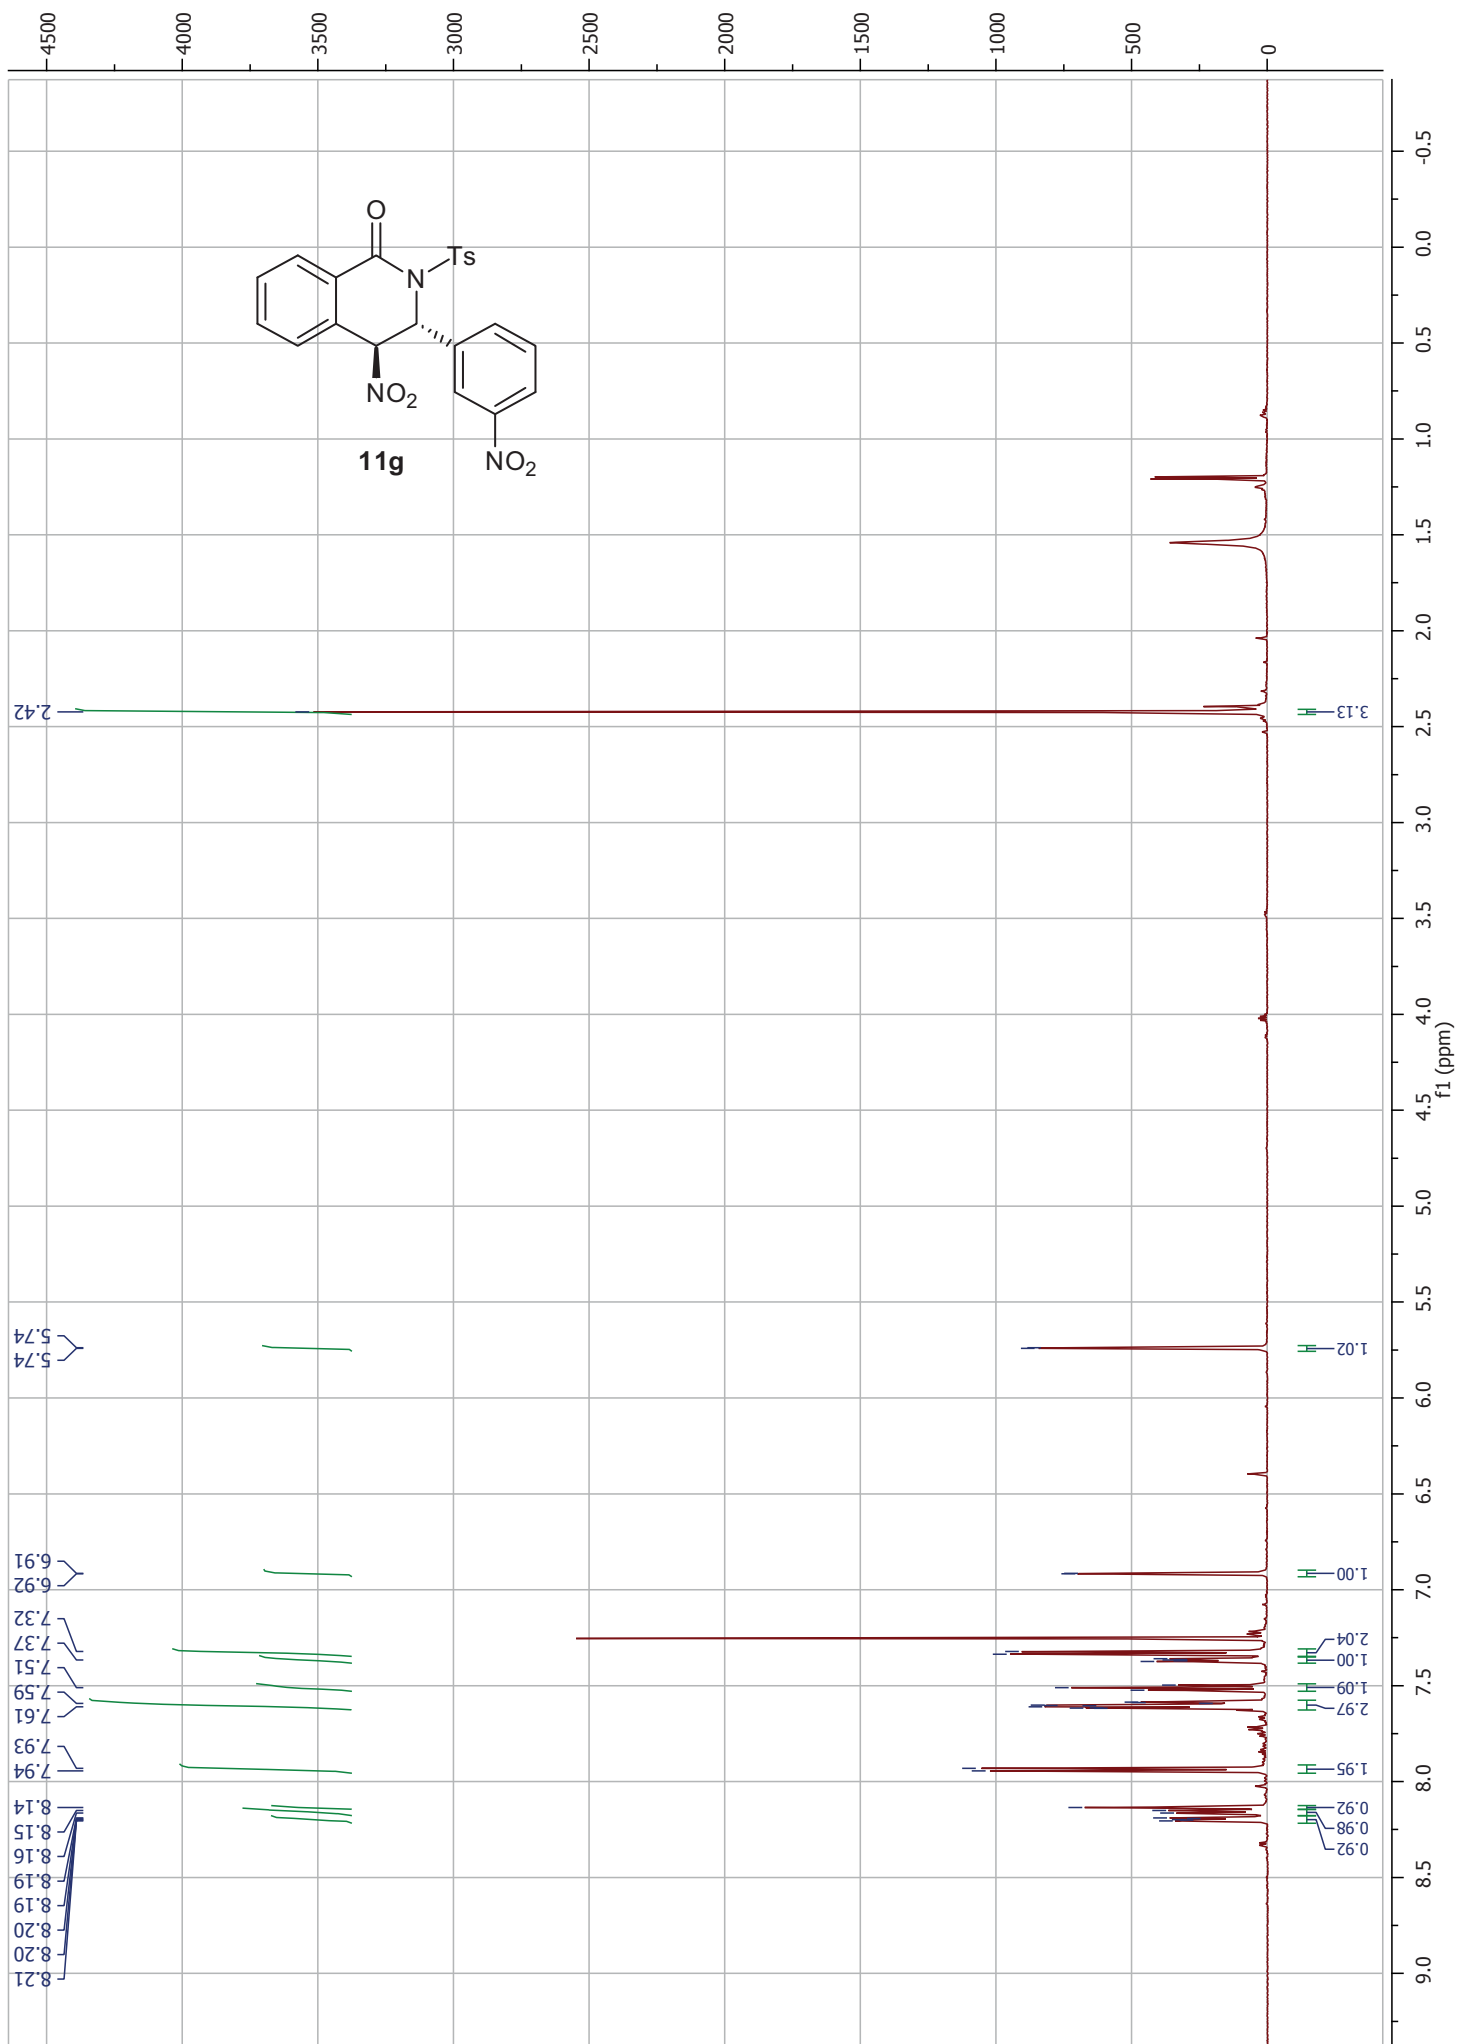

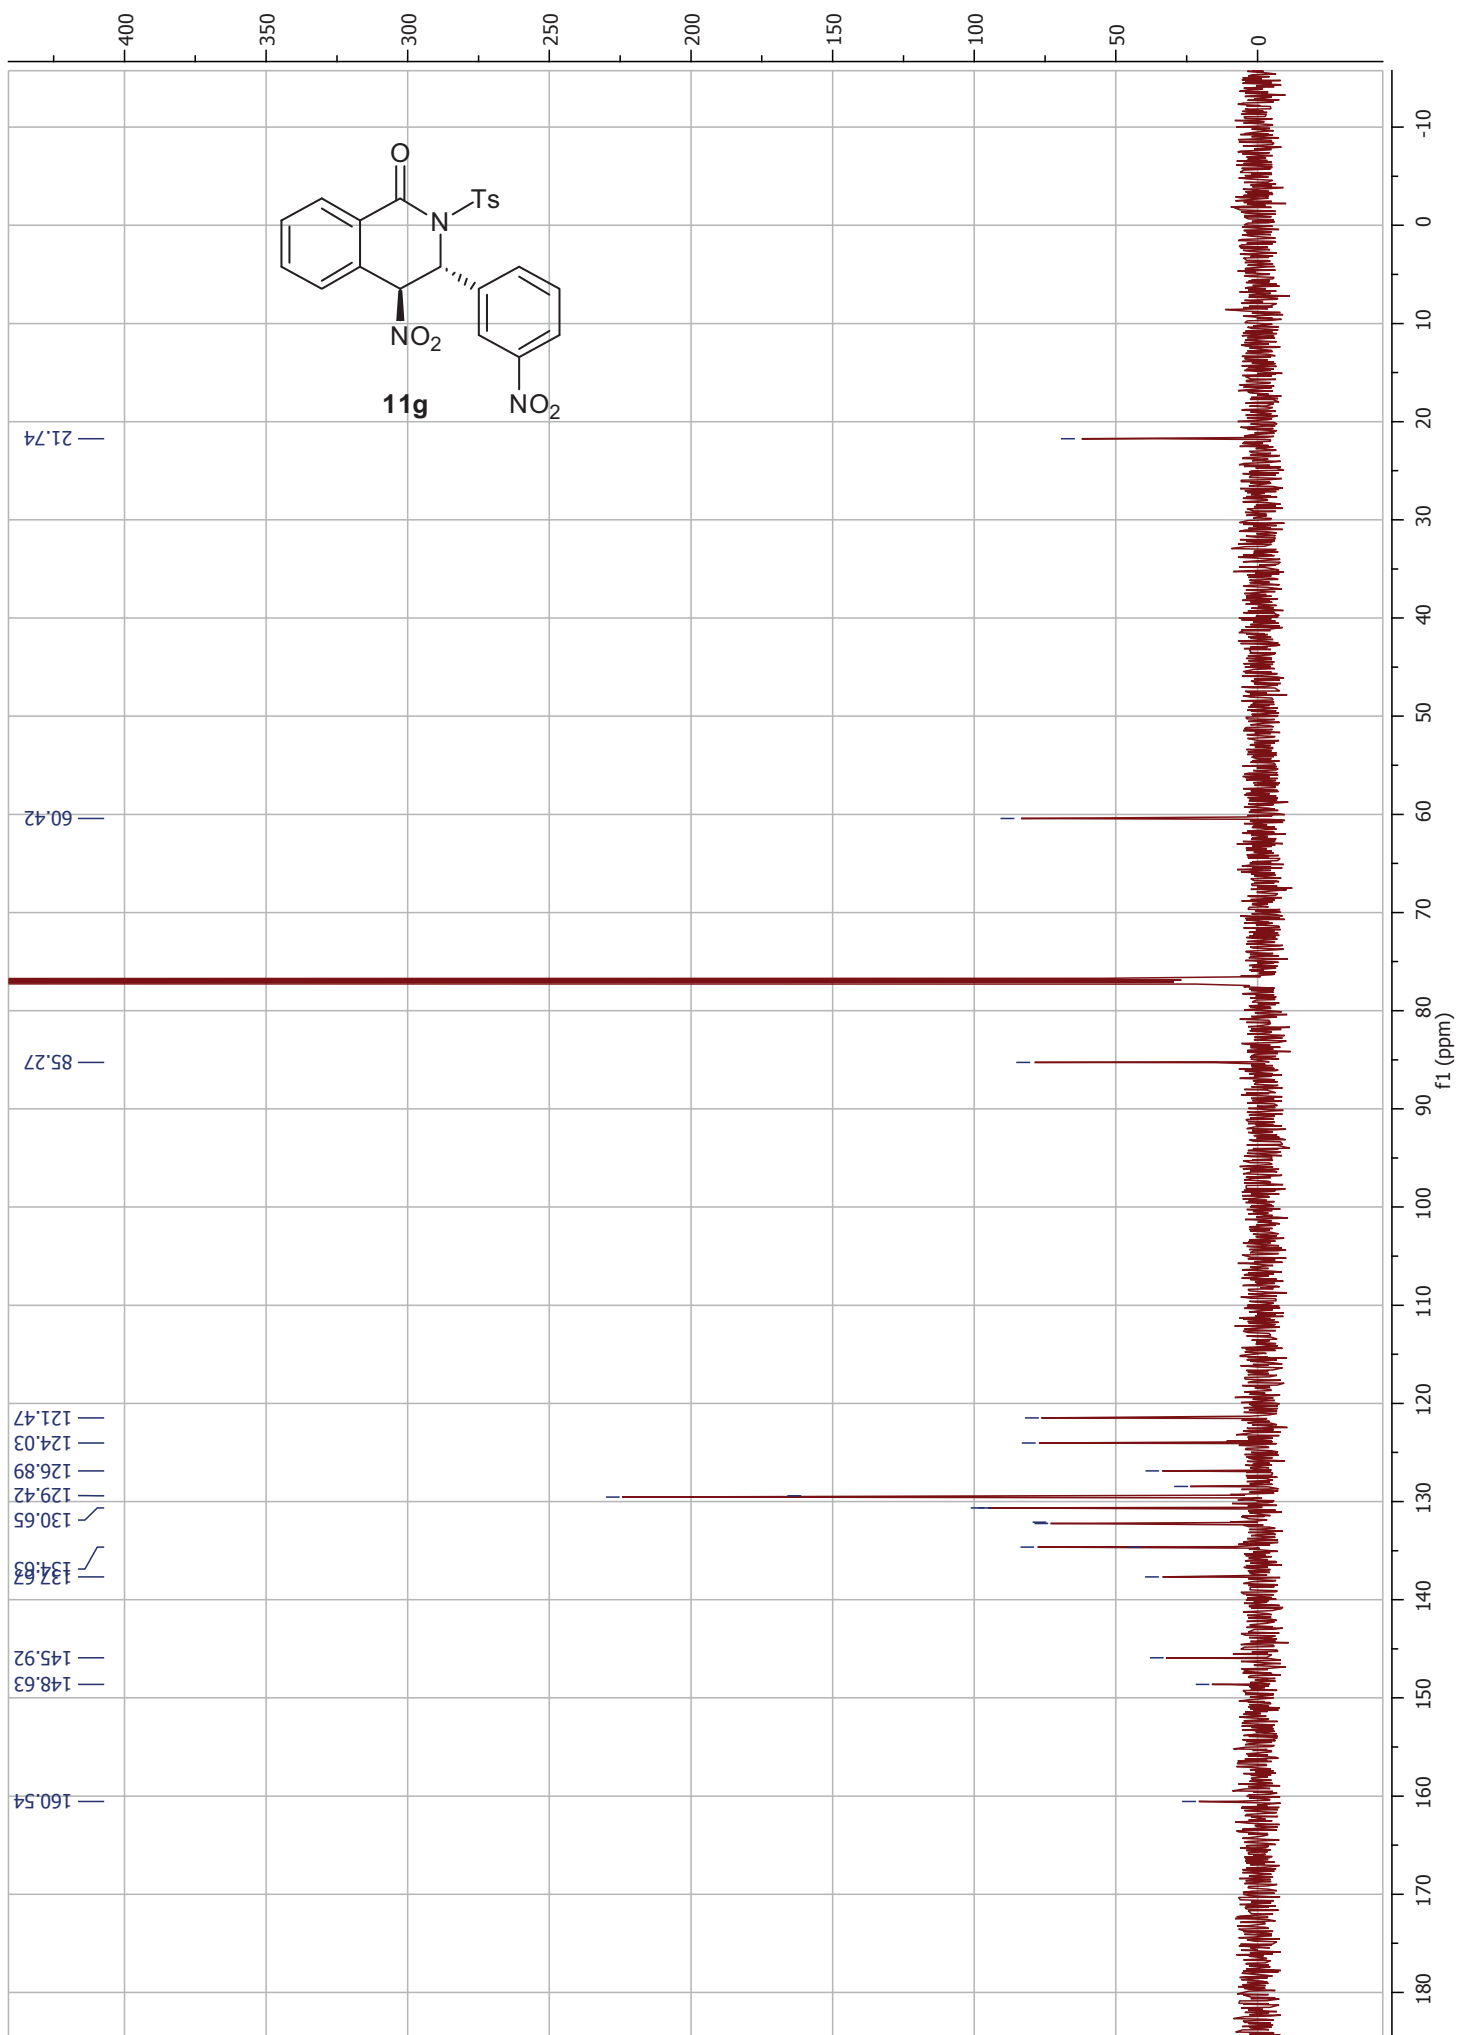





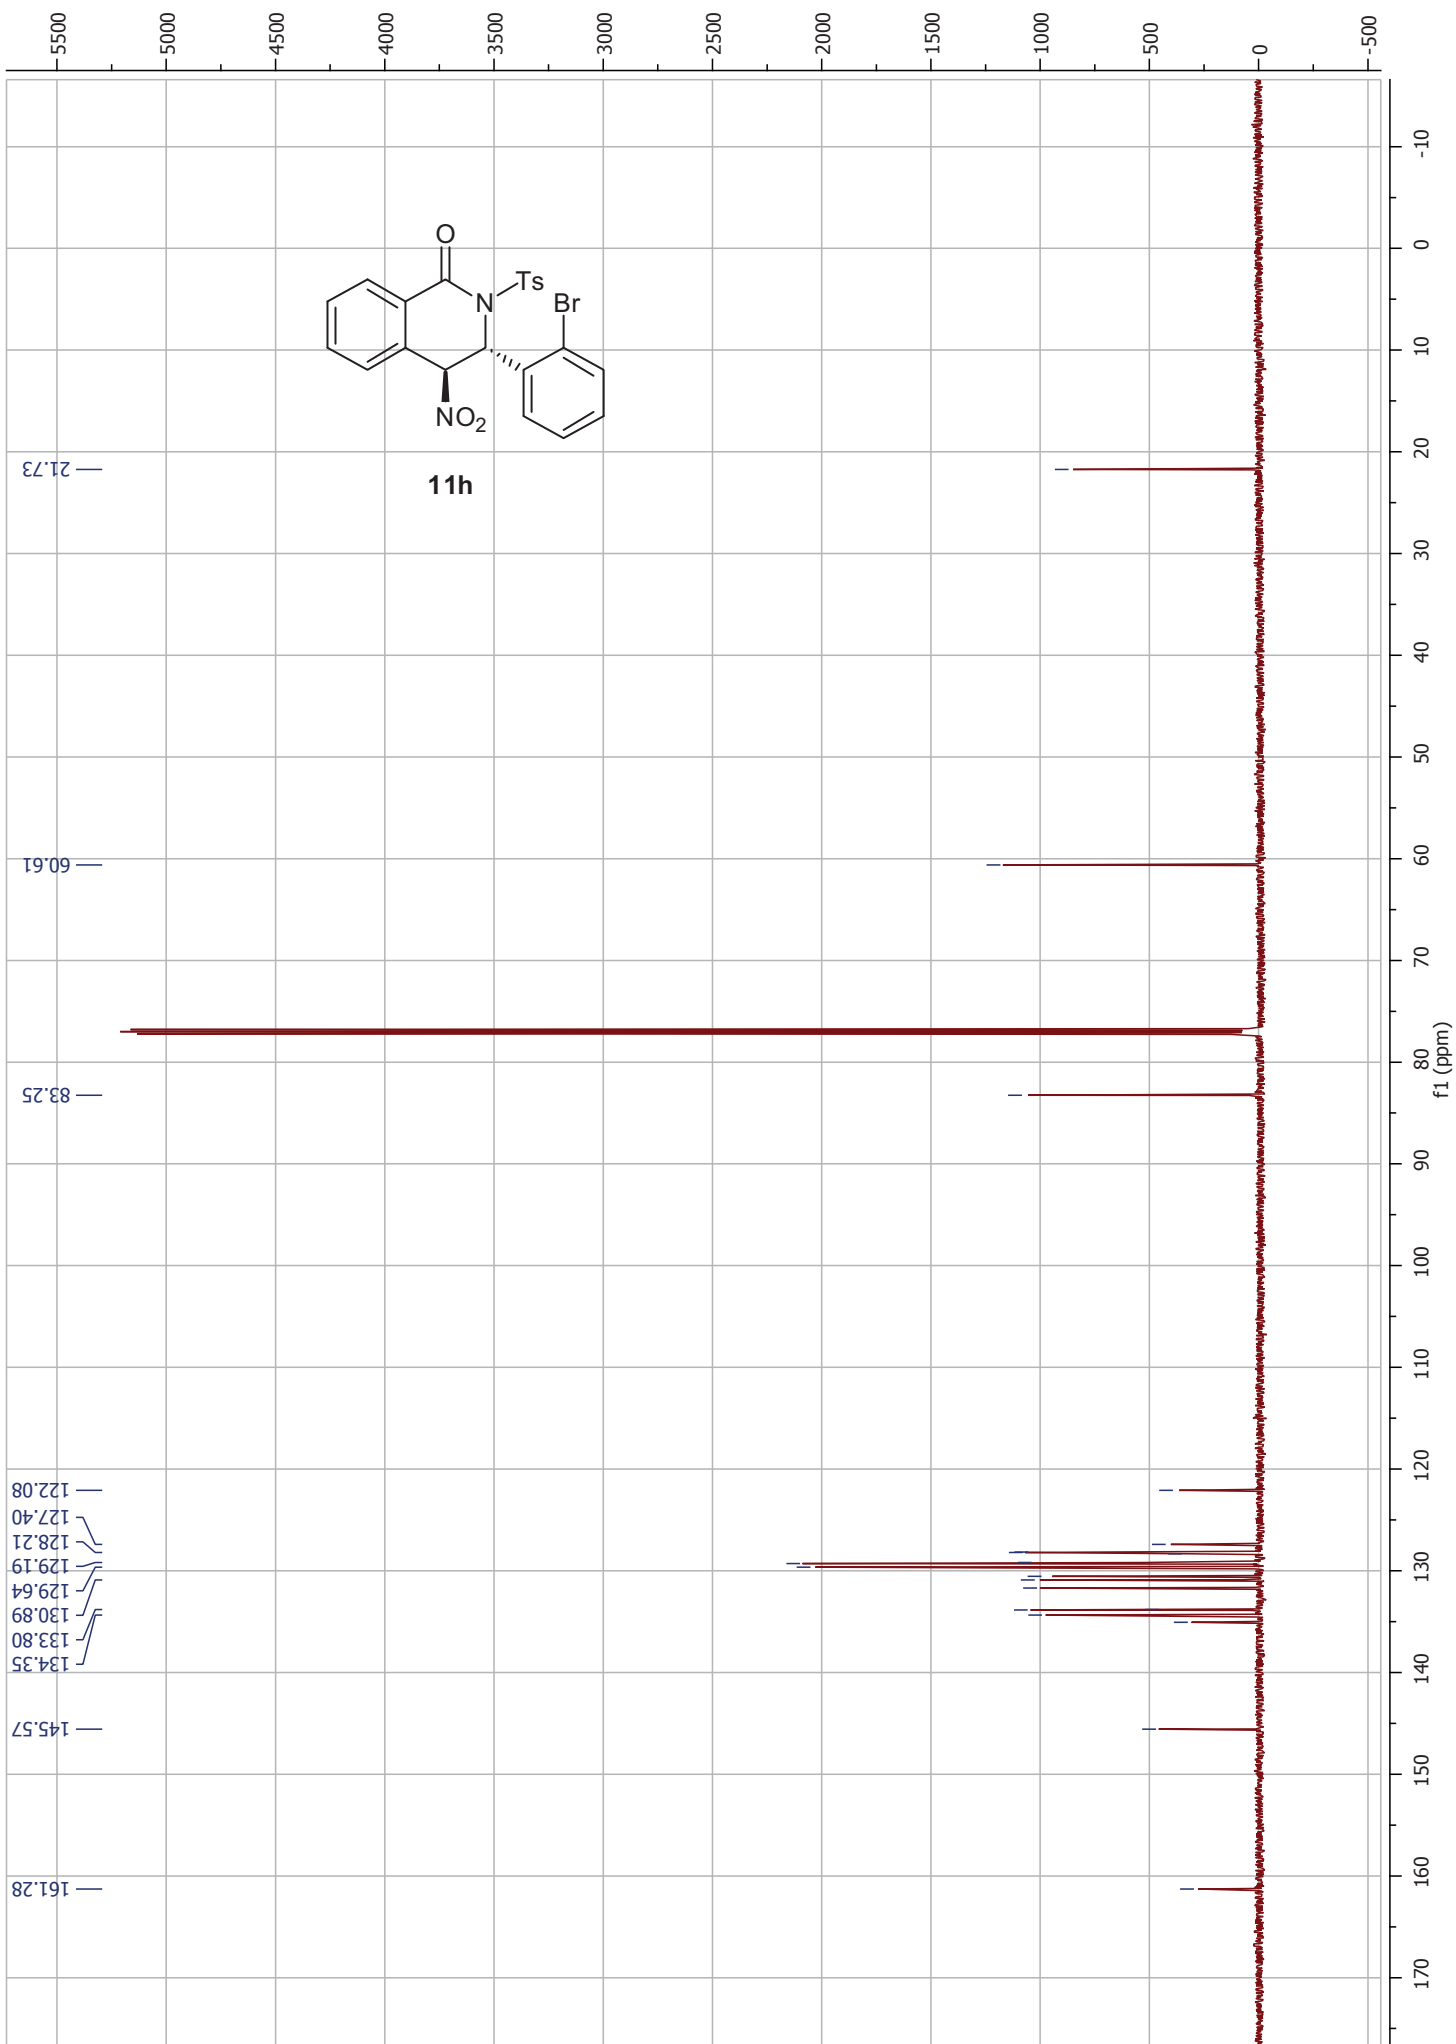



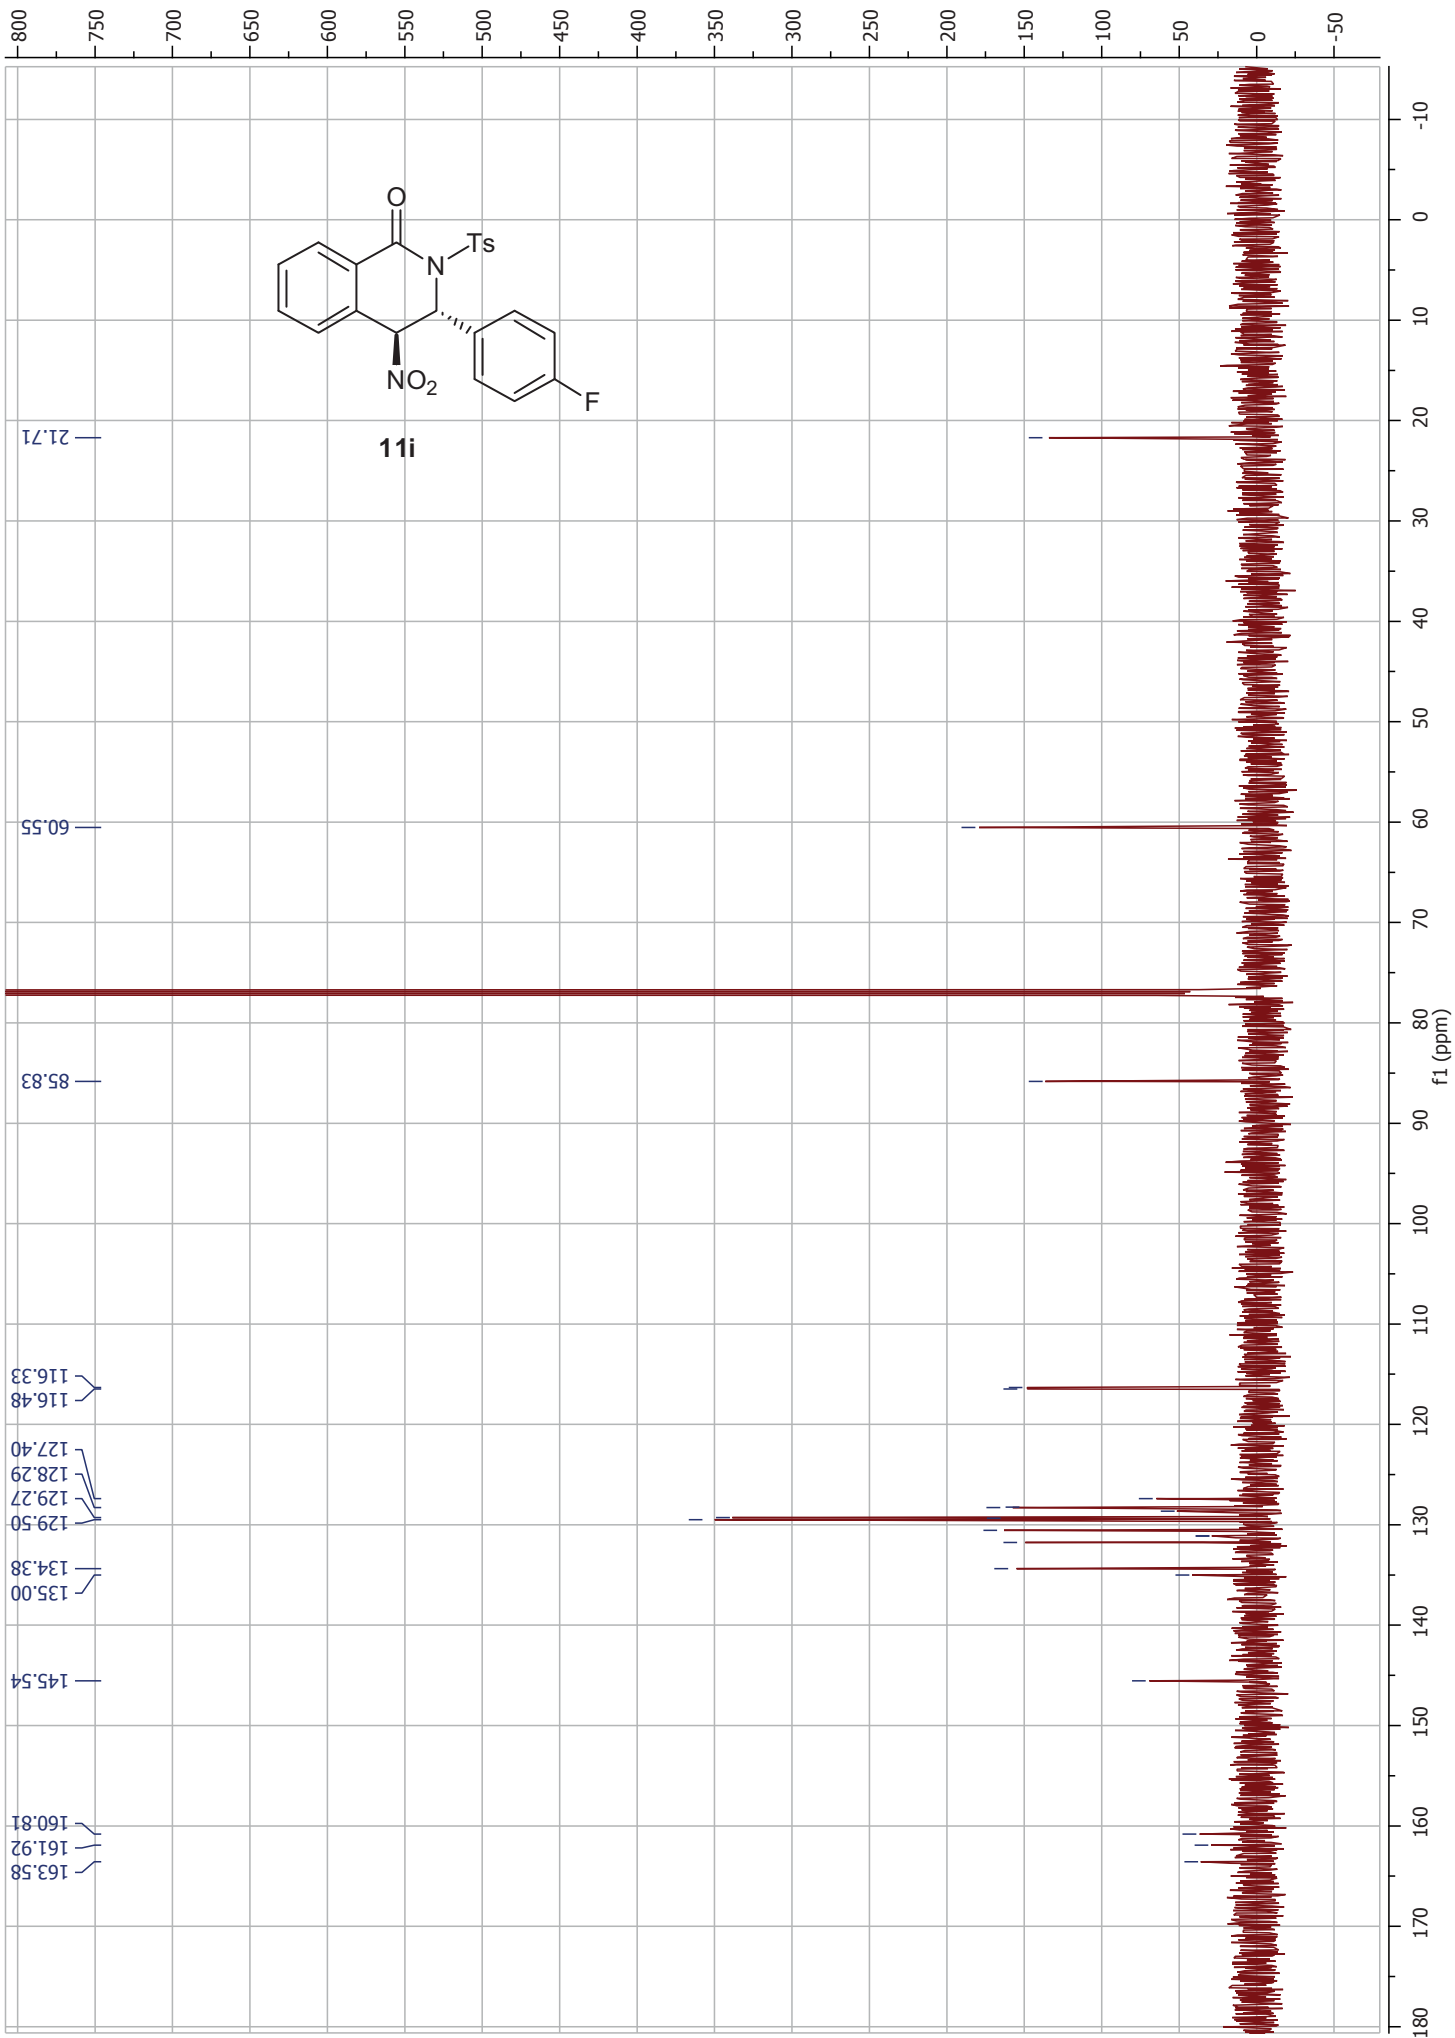

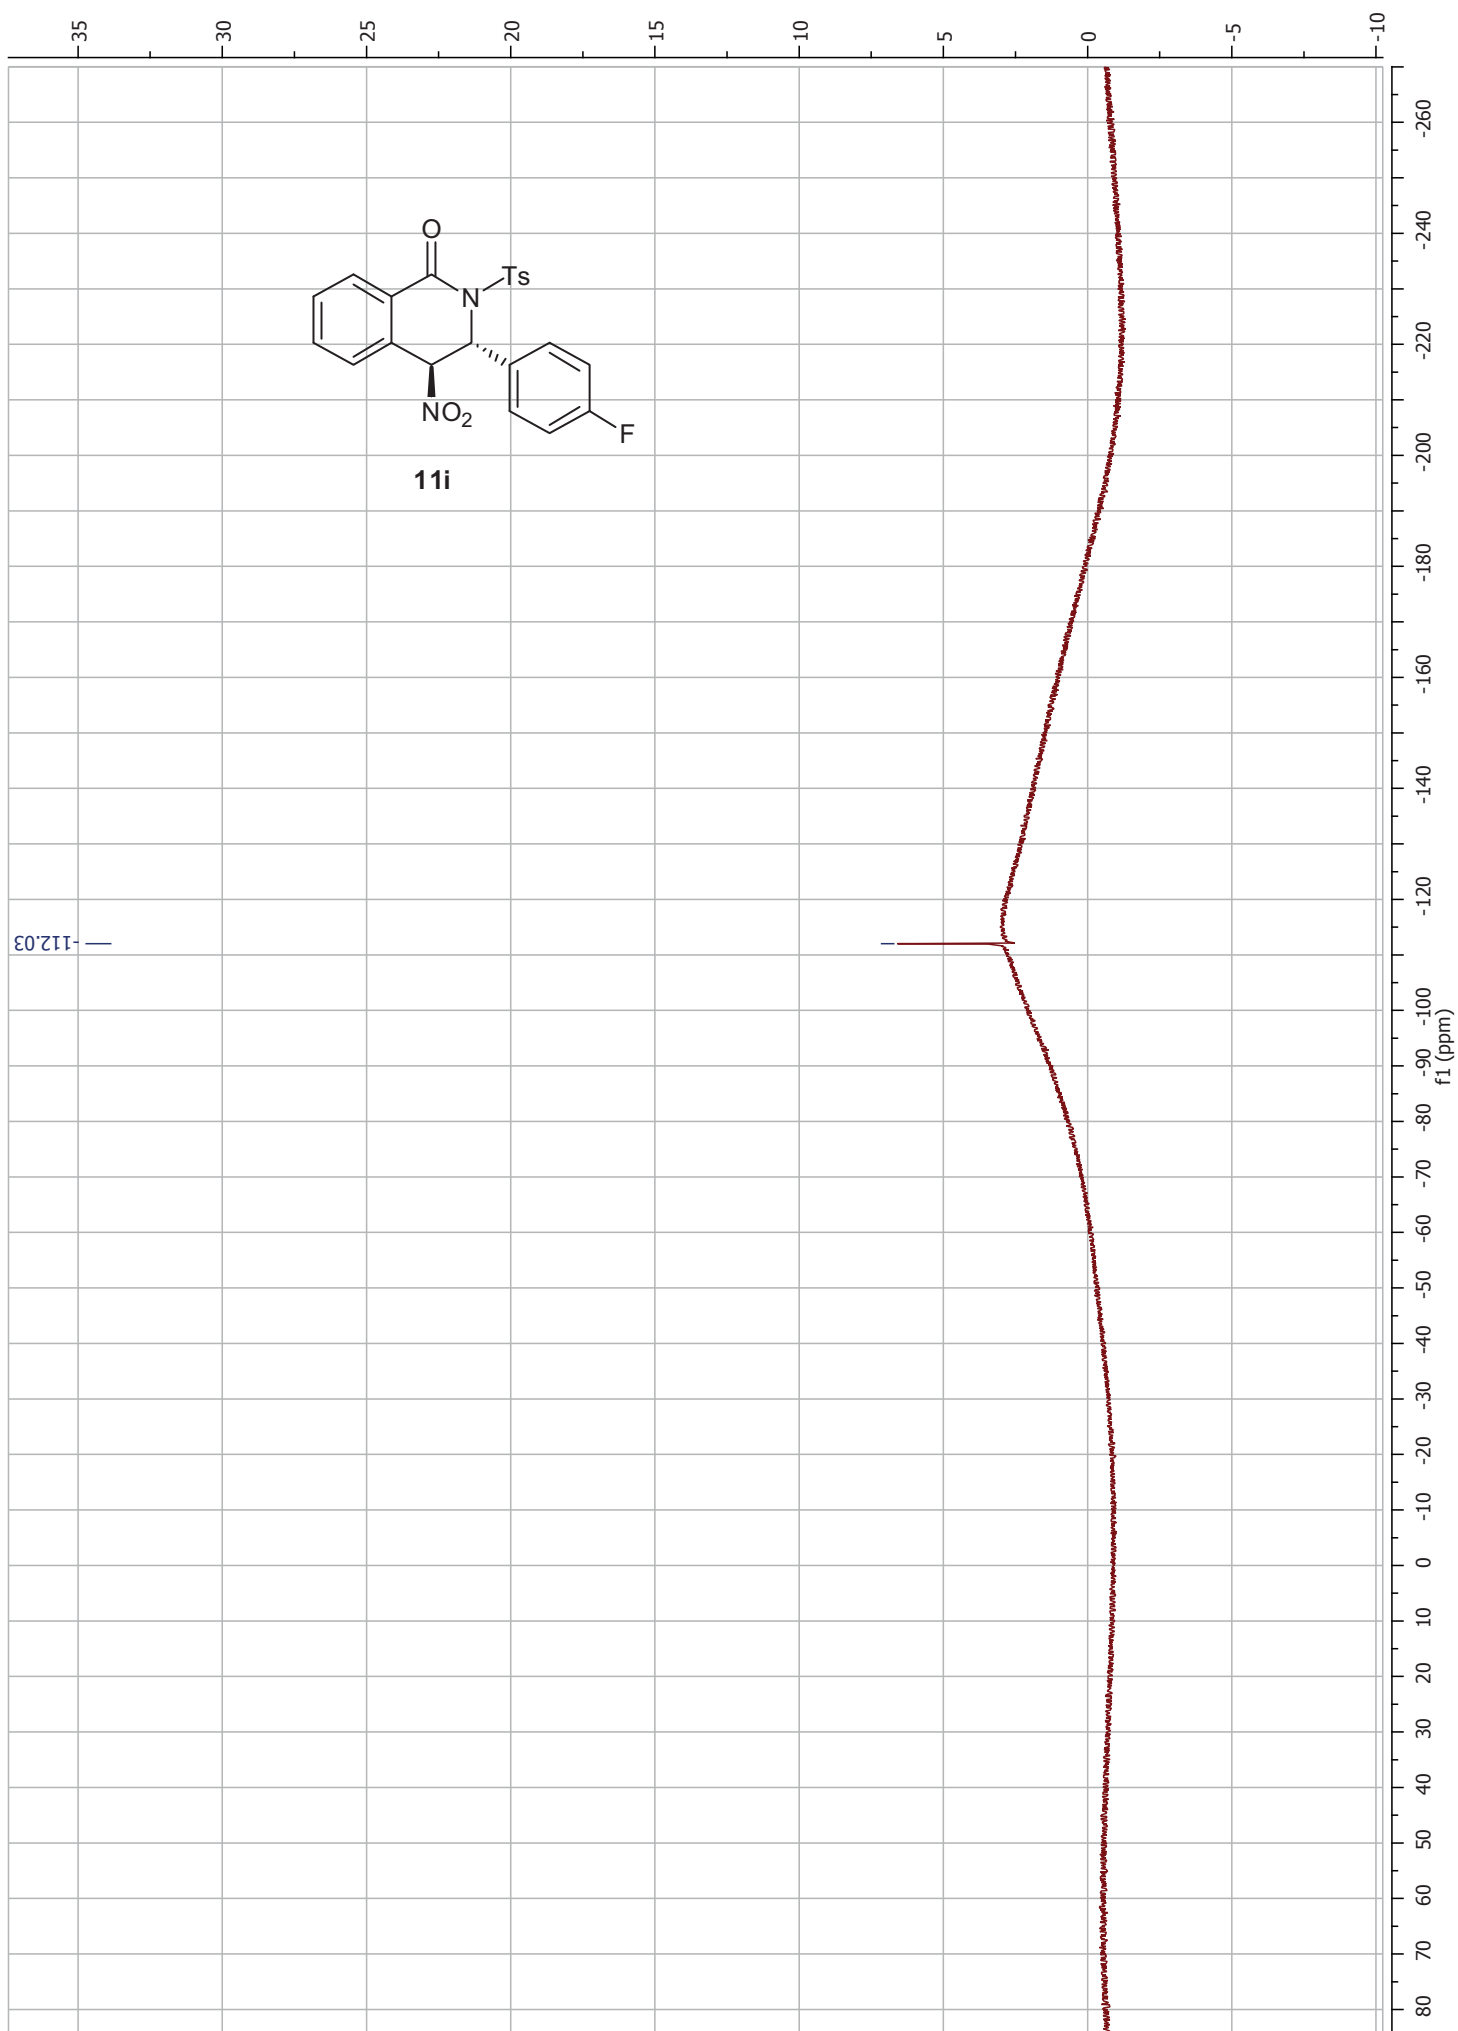

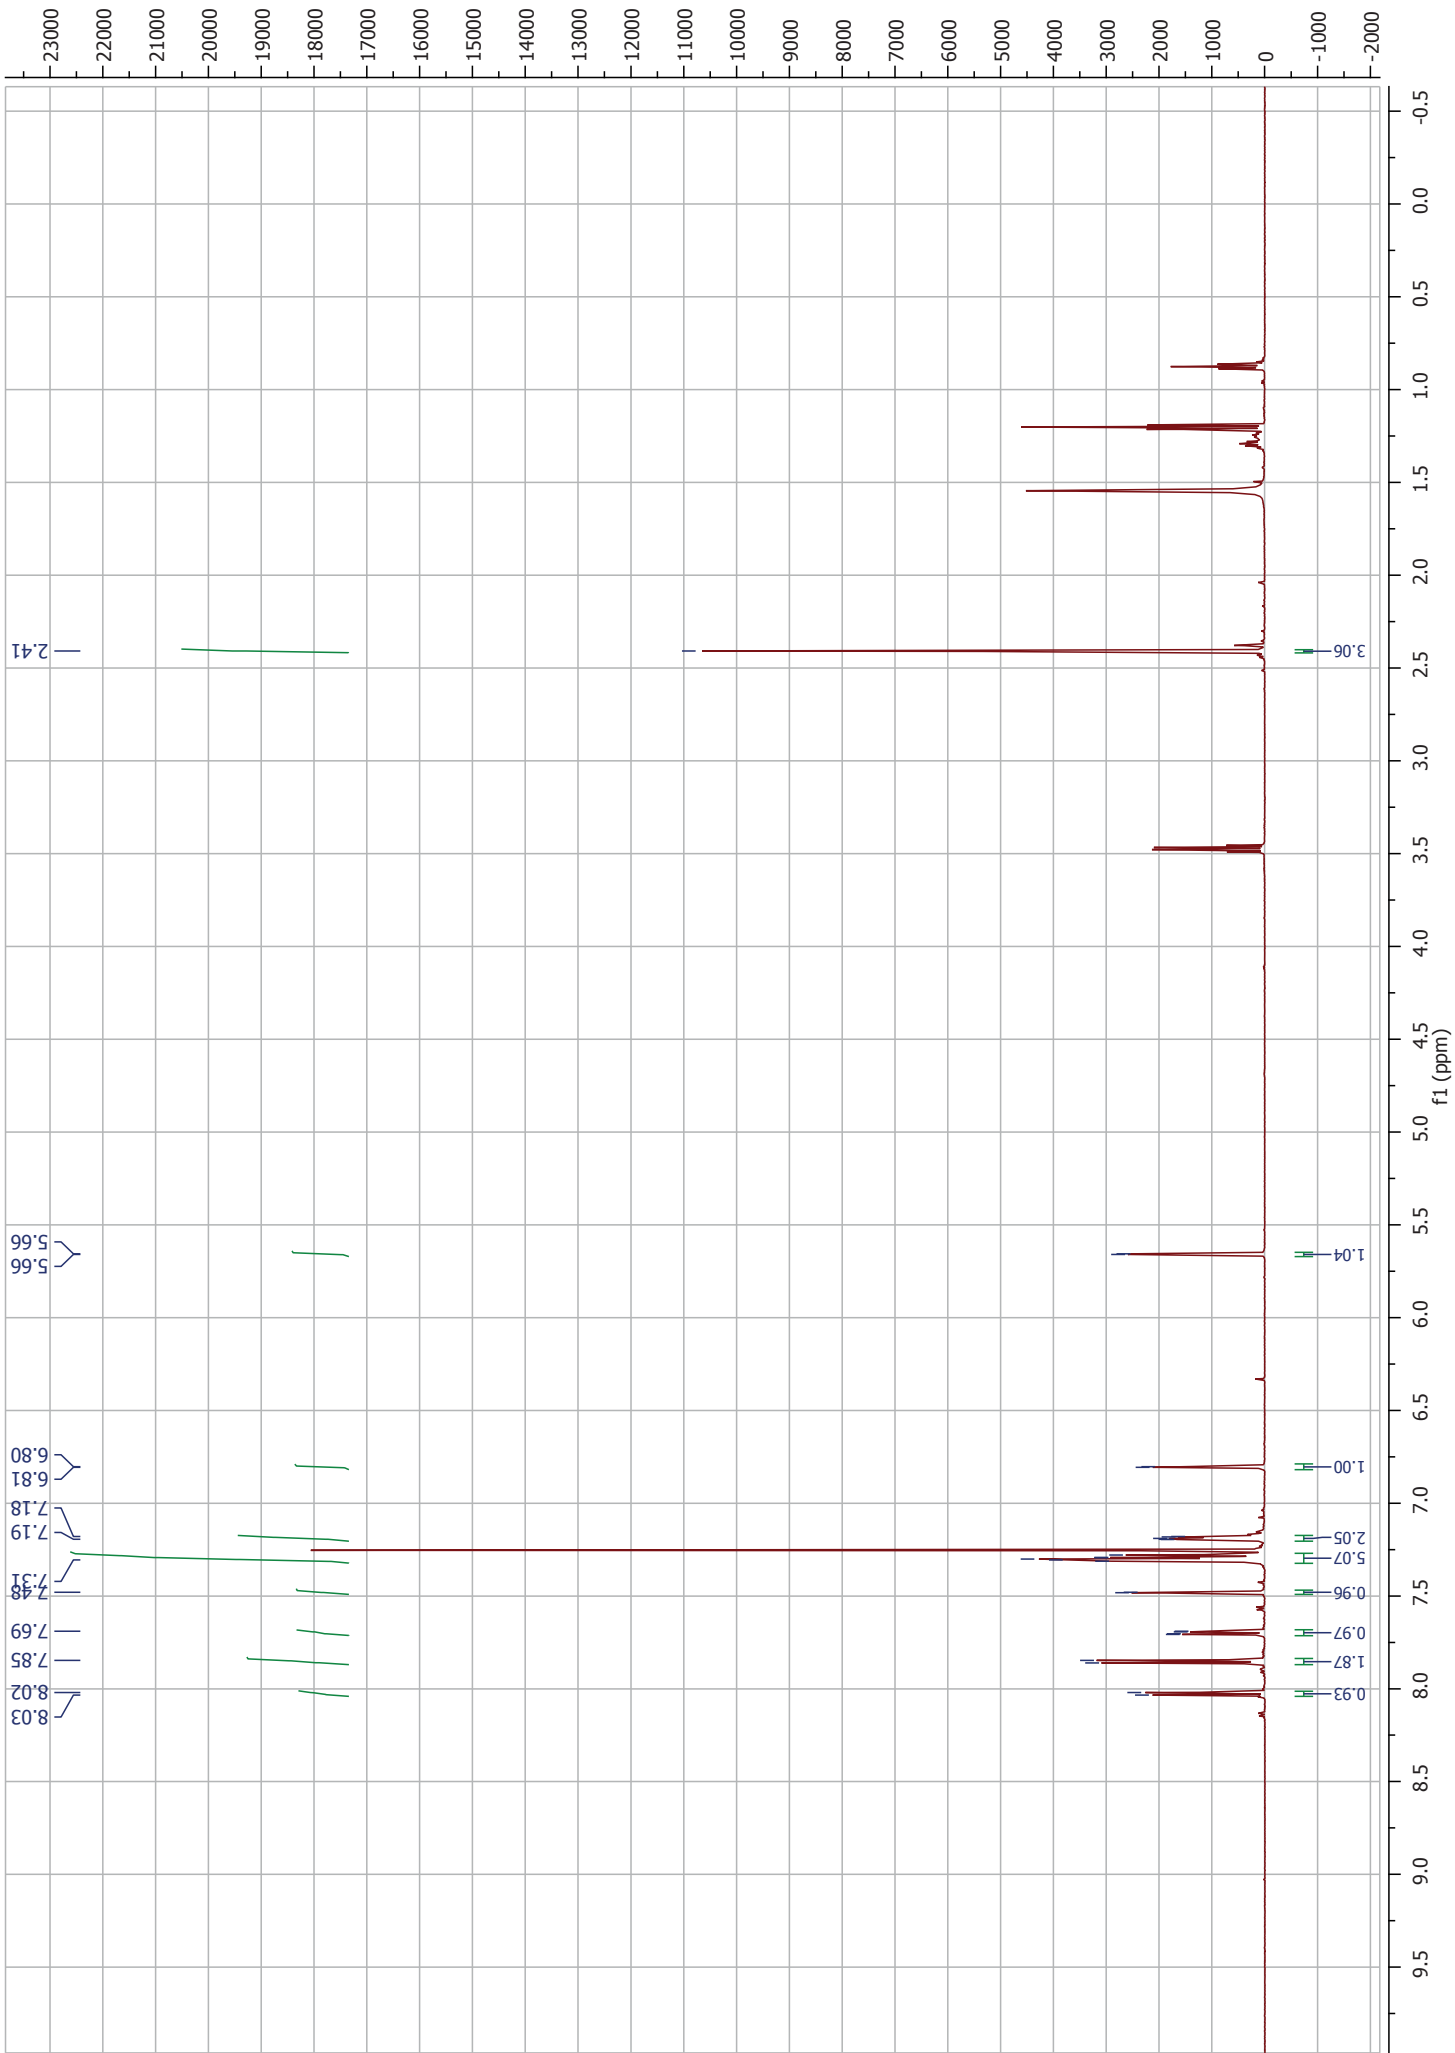

Supplement: NIHMS66362-supplement-Supporting_Information.pdf [file NIHMS66362-supplement-Supporting_Information.pdf]
